# Models for Eco-evolutionary Extinction Vortices and their Detection

Peter NABUTANYI and Meike J. WITTMANN

Bielefeld University

## Abstract

1  
2 The smaller a population is, the faster it loses genetic variation due to genetic drift. Loss  
3 of genetic variation can reduce population growth rate, making populations even smaller and  
4 more vulnerable to loss of genetic variation, and so on. Ultimately, the population can be driven  
5 to extinction by this "eco-evolutionary extinction vortex". So far, extinction vortices due to  
6 loss of genetic variation have been mainly described verbally. However, quantitative models are  
7 needed to better understand when such vortices arise and to develop methods for detecting  
8 them. Here we propose quantitative eco-evolutionary models, both individual-based simulations  
9 and analytic approximations, that link loss of genetic variation and population decline. Our  
10 models assume stochastic population dynamics and multi-locus genetics with different forms  
11 of balancing selection. Using mathematical analysis and simulations, we identify parameter  
12 combinations that exhibit strong interactions between population size and genetic variation as  
13 populations decline to extinction and match our definition of an eco-evolutionary vortex, i.e.  
14 the per-capita population decline rates and per-locus fixation rates increase with decreasing  
15 population size and number of polymorphic loci. We further highlight cues and early warning  
16 signals that may be useful in identifying populations undergoing an eco-evolutionary extinction  
17 vortex.

18 Keywords: Extinction vortex, genetic diversity, fluctuating selection, reversal of dominance, het-  
19 erozygote advantage, early-warning signals.

## 20 1 Introduction

21 The fate of small populations is often strongly affected by demographic stochasticity and genetic  
22 factors. Small populations can rapidly lose genetic variation due to genetic drift. Additionally,  
23 inbreeding, i.e. mating between relatives, is more likely in small than large populations. In captive

24 and natural populations, inbreeding and reduced heterozygosity are often associated with a reduction  
25 in population fitness or in a fitness component (Saccheri et al. 1998; Reed and Frankham 2003). For  
26 instance, reduced heterozygosity is associated with reduced hatching success and increased mortality  
27 rates of chicks in a metapopulation of southern dunlins (Blomqvist et al. 2010). Inbreeding is also  
28 associated with higher mortality rates in captive ungulates (Ralls et al. 1979; Ballou and Ralls  
29 1982), lower breeding recruitment rate in wolves (Bensch et al. 2006), reduced litter size in the  
30 Iberian Lynx (Palomares et al. 2012), and reduced disease resistance in *Drosophila melanogaster*  
31 and the Tasmanian devil (Spielman et al. 2004; Miller et al. 2011).

32 In summary, small populations experience genetic problems such as loss of variation and inbreeding  
33 depression, and these genetic problems can reduce population fitness. The reduction in population  
34 fitness components can cause a further decline in population size, thereby exposing the population  
35 to even more severe genetic problems. Shrinking population size and genetic problems can thus form  
36 an extinction vortex (Gilpin and Soulé 1986), a positive feedback loop that can ultimately drive the  
37 population to extinction. Gilpin and Soulé (1986) proposed four types of extinction vortices depend-  
38 ing on the major factors driving the feedback loop. The R vortex is driven by the feedback between  
39 decreasing population size and increasing variance in growth rate, e.g. because of more variable sex  
40 ratio and resulting mate-finding problems. For the D vortex, the feedback is mediated by increasing  
41 fragmentation of the species distribution at small population size. The F and A vortices are mainly  
42 driven by genetic factors such as genetic drift, loss of heterozygosity and generally loss of genetic  
43 variation. In particular, the F vortex is driven by inbreeding depression and loss of heterozygosity  
44 and less dependent on the environment while the A vortex involves reduction of a population's  
45 adaptive potential in new environments. Our study is closely related to the F and A vortices and to  
46 distinguish them from other vortices, e.g. those caused by anthropogenic Allee effect (Courchamp  
47 et al. 2006), we refer to extinction due to feedback loops between genetic deterioration and declining  
48 population sizes as an "eco-evolutionary vortex".

49 Genetic problems in small populations can be divided into three categories: inbreeding depression,  
50 mutation accumulation and mutational meltdown, and loss of genetic variation and evolutionary  
51 potential (Frankham 2005). It is possible in principle that each of them alone or any combination  
52 of them can give rise to an eco-evolutionary vortex. Such extinction vortices are often described  
53 verbally in the literature. However, to be able to understand the conditions under which populations  
54 can enter an extinction vortex and develop methods to detect populations in an extinction vortex,  
55 we need quantitative models. So far, progress on such quantitative models has mostly been made  
56 for the two of the three types of genetic problem: inbreeding depression and mutation accumulation.  
57 For example, inbreeding depression can cause an "inbreeding vortex" (Tanaka 1997, 1998, 2000)  
58 which occurs when a large population with its relatively high frequency of recessive deleterious  
59 alleles is suddenly reduced in size, leading to more mating between relatives. Inbreeding depression

60 can also give rise to a genetic Allee effect, with a rapid change in extinction probability around  
61 some critical population size (Wittmann et al. 2018). Furthermore, inbreeding depression is often  
62 included in population viability analyses, e.g. in a recent study on mountain lions by Benson et al.  
63 (2019) and many studies using the software VORTEX (Lacy 1993). For mutation accumulation, eco-  
64 evolutionary models have been developed to show how time to extinction depends on the population's  
65 carrying capacity (Lynch and Gabriel 1990) and to quantify the strength of the mutational meltdown  
66 compared to a scenario without eco-evolutionary feedbacks (Coron et al. 2013). However, for the third  
67 type of genetic problem in small populations, loss of genetic variation and evolutionary potential, to  
68 our knowledge, there is so far no quantitative model for the potentially resulting extinction vortex.  
69 In this paper, we thus aim to develop a quantitative model for an extinction vortex driven by the  
70 positive feedback between loss of genetic variation and reduction in population size.

71 Because of a lack of appropriate detection methods, the contribution of genetic problems to extinction  
72 of endangered populations may often be underrated or remain unnoticed. Using our model, we want  
73 to identify key features and cues that can be used to identify natural populations caught in an  
74 extinction vortex driven by loss of genetic variation. Regarding the detection of extinction vortices  
75 in general, a retrospective analysis of demographic data from 10 already extinct wildlife populations  
76 showed that both year-to-year rates of population decline and variance in size increased as extinction  
77 was approached (Fagan and Holmes 2006). For extinction vortices due to loss of genetic variation,  
78 it would be useful to have measures of relevant levels of genetic variation. However, we generally  
79 do not know which loci contribute to fitness and how many such loci there are. Therefore, we  
80 also evaluate whether extinction vortices can be detected by some general early-warning signals for  
81 extinction in changing environments (Drake and Griffen 2010; Dakos and Bascompte 2014; Jarvis  
82 et al. 2016; Sommer et al. 2017; de Silva and Leimgruber 2019). As the environment gradually  
83 deteriorates, the commonly used early-warning statistical measures such as autocorrelation, standard  
84 deviation, coefficient of variation and kurtosis are expected to increase near bifurcation points where  
85 the population will shift to a new equilibrium, while skewness either increases if the new equilibrium  
86 point is higher or decreases otherwise (see Dakos et al. (2012) for an overview). In our case, the  
87 magnitude and stability of equilibria is not affected by a deteriorating external environmental factor,  
88 but genetic variation as an internal factor.

89 Here we develop stochastic individual-based eco-evolutionary models and analytic approximations  
90 for the feedback between loss of genetic variation and population decline. We assume multi-locus  
91 genetics and focus on scenarios where genetic variation can be maintained in large populations  
92 due to some form of balancing selection, but is at risk of being lost due to genetic drift in small  
93 populations. First, we partition the parameter space into regions with qualitatively different eco-  
94 evolutionary behaviour. We then pick exemplary cases from each region to check for the presence of  
95 an eco-evolutionary vortex, which we define by two key features: (i) the per-capita rate of population

96 decline increases with both decreasing genetic variation and declining population size and (ii) the  
97 per-locus rate of loss of genetic variation increases with declining population size as well as decreasing  
98 genetic variation. In addition, we use our model to test for three hypothesized cues of extinction  
99 vortices: (i) there exists a critical population size and (or) critical level of genetic variation below  
100 which population decline and (or) loss of genetic variation suddenly increases substantially, (ii) loss  
101 of genetic variation and population decline and extinction occur on the same time scale and, (iii)  
102 early-warning signals manifest as population size decreases.

## 103 **2 Methods**

104 In this section, we describe two different approaches to modeling the interplay between loss of genetic  
105 variation and population decline: an individual-based model (IBM) and an analytic approximation.  
106 Individuals in our model are diploid, hermaphroditic and have  $n$  unlinked loci, each with two alleles,  
107  $a$  and  $A$ .

### 108 **2.1 Individual-based Model**

109 We start with a population size drawn from a Poisson distribution with mean  $K$ , the carrying  
110 capacity. The alleles are initially drawn with equal probability across all loci of each individual.  
111 For each individual at generation  $t$ , the actual number of offspring is independently drawn from a  
112 Poisson distribution with mean

$$E_t = \begin{cases} e^r & \text{if } N_t < K, \\ e^{r(1-\frac{N_t}{K})} & \text{if } N_t \geq K, \end{cases} \quad (2.1)$$

113 where  $r$  and  $N_t$  are the maximum intrinsic growth rate and population size at generation  $t$  respec-  
114 tively. In this model, the population grows geometrically when below  $K$ , but at  $K$  and larger sizes  
115 follows the Ricker model to prevent population explosion. The assumption that small populations do  
116 not experience any density dependence simplifies the mathematical analysis and should be a good  
117 approximation for many small endangered populations. However, we also consider a fully density-  
118 dependent model, where we only use the second part of Equation (2.1), i.e. the Ricker model, at all  
119 population sizes.

120 Each offspring produced by the focal parent randomly chooses the second parent from all the available  
121 parents in the population, including the focal parent. For each locus, the offspring inherits one  
122 randomly chosen allele from each parent.

123 We consider two selection mechanisms, both of which give rise to balancing selection such that in  
124 a large population both alleles can be maintained. The first mechanism is heterozygote advantage,

125 where heterozygotes have higher fitness than either homozygote. In this paper, both homozygotes  
126 have the same fitness ( $w_{AA} = w_{aa} = 1 - s$ , where  $0 < s < 1$  is the selection coefficient) while  
127 heterozygotes have maximum fitness ( $w_{Aa} = 1$ ). The second mechanism is fluctuating selection with  
128 reversal of dominance (Wittmann et al. 2017; Bertram and Masel 2019; Connallon and Chenoweth  
129 2019). Recent studies have suggested dominance reversals, e.g. in *Drosophila melanogaster* (Chen  
130 et al. 2015) and beetles (Grieshop and Arnqvist 2018). Specifically, we assume that the fitness of  
131 homozygote genotypes fluctuates temporally. At each generation, the fitness of heterozygotes is  
132 intermediate between that of the two homozygotes, but closer to the currently fitter homozygote  
133 (Figure 1), i.e. there is beneficial reversal of dominance (Curtsinger et al. 1994). This causes the het-  
134 erozygote genotype to have a higher geometric mean fitness than either homozygote, and balancing  
135 selection emerges. We achieve this by setting:  $w_{AA,t} = (1 - s_{A,t})/(1 + s)$ ,  $w_{aa,t} = (1 - s_{a,t})/(1 + s)$  and  
136  $w_{Aa,t} = (1 - h_t \cdot s_{A,t} - (1 - h_t) \cdot s_{a,t})/(1 + s)$ , where  $s_{A,t} = s \cdot \sin(2\pi \cdot t/\kappa)$  and  $s_{a,t} = s \cdot \sin(\pi + 2\pi \cdot t/\kappa)$   
137 are temporally fluctuating selection coefficients and  $h_t = 0.5 - c \cdot \sin(2\pi \cdot t/\kappa)$  is the temporally fluc-  
138 tuating dominance coefficient. In this model,  $s$  determines the amplitude of fluctuating selection,  
139  $\kappa$  is the number of generations in a complete cycle (we use  $\kappa = 50$  throughout the paper), and  
140  $0 \leq c \leq 0.5$  determines the magnitude of dominance changes. The division by  $1 + s$  ensures that  
141 all fitness values are between 0 and 1. We also run a neutral control scenario where all the three  
142 genotypes have maximum fitness of 1 (i.e. selection coefficient  $s = s_{a,t} = s_{A,t} = 0$ ) at all generations.  
143 Denoting  $w_{g,t}$  as the fitness of genotype  $g \in \{AA, Aa, aa\}$  at generation  $t$  and assuming multiplica-  
144 tive fitness across loci, each offspring is viable with probability

$$W = \prod_{l=1}^n w_{g_l,t}, \quad (2.2)$$

145 where  $g_l$  is the genotype at locus  $l$ . After all individuals have reproduced, all the viable offspring  
146 then replace the parent generation. In both selection mechanisms, mutation is not considered and  
147 therefore an allele is not reintroduced once lost at a given locus. The current number of polymorphic  
148 loci, i.e. loci where both alleles are still present in the population, is denoted  $H_t$ .

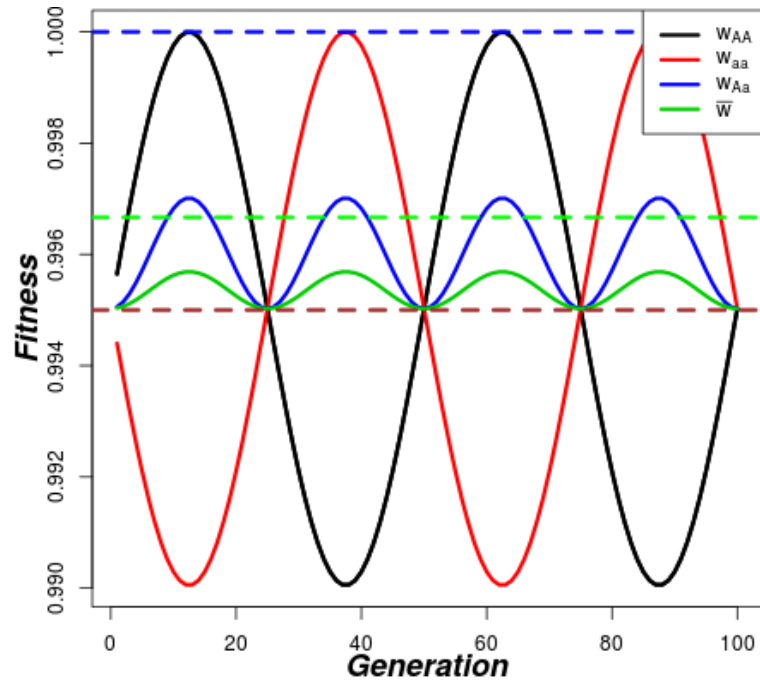

Figure 1: Example of fitness trajectories under fluctuating selection with reversal of dominance. The solid black, red and blue lines represent the fluctuating fitness for homozygotes  $AA$  and  $aa$  and heterozygote  $Aa$  genotypes, respectively, while the green-solid line is for mean population fitness. For the heterozygote advantage mechanism, the dashed blue and brown lines represent fitnesses of heterozygote and homozygote genotypes, respectively, while the green-dashed line is the mean population fitness. The parameters are  $s = 0.005$ ,  $c = 0.2$ ,  $\kappa = 50$ .

## 149 2.2 Parameter space

150 Two key model parameters are the intrinsic growth rate,  $r$ , which determines the fertility rate and  
 151 therefore population growth rate, and the selection coefficient,  $s$ , which determines the offspring  
 152 viability and influences the rate at which genetic variation is lost. To determine regions in the  $r - s$   
 153 plane with qualitatively different behavior, we consider the average number of surviving offspring per  
 154 individual ( $SOI$ ), which is given by the product of the average number of offspring per individual  
 155  $E$  (see Equation 2.1) and the average viability, i.e. fitness, of offspring at a given level of genetic  
 156 variation ( $W(H)$ ). To obtain a "critical number of polymorphic loci",  $H_c$ , below which population  
 157 crash to zero occurs, we set  $SOI$  to 1, the boundary point between population growth and decline,  
 158 and solve for  $H$  (see Appendix Equation A.26).

159 For the heterozygote advantage mechanism where both homozygotes have the same fitness  $1 - s$  and  
 160 heterozygotes have fitness 1, the mean fitness for locus  $l$  with allele frequency  $x_l$  is

$$w(x_l) = 1 - s(1 - 2x_l(1 - x_l)). \quad (2.3)$$

161 We then approximate the fitness in terms of polymorphic loci by assuming an allele frequency of 0.5  
 162 at all polymorphic loci, the expected equilibrium frequency under symmetric heterozygote advantage.

163 The fitness,  $W(H)$  is thus given by

$$W(H) = \left(1 - \frac{s}{2}\right)^H (1 - s)^{n-H}. \quad (2.4)$$

164 Since the assumption of an allele frequency of 0.5 is generally violated, fitness is overestimated and  
165 the critical number of loci is thus underestimated to some extent by this approach. For fluctuating  
166 selection with reversal of dominance, the geometric mean fitness of the genotypes is used to calculate  
167 the mean population fitness for a given locus. Briefly, we obtain the geometric mean fitness for the  
168 three genotypes ( $AA$ ,  $Aa$  and  $aa$ ) denoted as  $G_{AA}$ ,  $G_{Aa}$  and  $G_{aa}$  respectively. In this study,  $s_A = s_a$ ,  
169 and therefore  $G_{AA} = G_{aa} = G_h$ , where  $G_h$  denotes the geometric mean fitness of either homozygote.  
170 Also, assuming an equilibrium frequency of 0.5 and multiplicative fitness across loci, the population  
171 fitness becomes

$$W(H) = (0.5(G_h + G_{Aa}))^H \cdot G_h^{(n-H)}. \quad (2.5)$$

## 172 2.3 Analysis

173 We run a total of 100 replicate populations and each replicate population is iterated until either the  
174 population goes extinct or appropriate maximum number of generations is reached. The maximum  
175 simulation time is chosen in such a way that all polymorphic loci are at least lost in the population.  
176 In this study, maximum simulation time of 3,000 generations was sufficient for all cases involving  
177  $N_0 = K = 200$  while 30,000 was used for  $N_0 = K = 2000$ . In our analysis, we define the level of  
178 genetic variation in terms of the number of polymorphic loci in the population.

179 For each replicate independently, the per-capita decline rate is calculated as  $\frac{N_t - N_{t+1}}{N_t}$  for each gener-  
180 ation  $t$ . The range of population sizes is divided into equally spaced bins of width 10 (population  
181 sizes 1 to 10, then 11 to 20,...). For each replicate and bin separately, we then calculate the mean  
182 population size and the corresponding mean per-capita rate. To get overall mean population size and  
183 mean per-capita rate for each bin, we take the means across all contributing replicates, i.e. replicates  
184 that have data points in the respective bin. In the same way, we calculate the per-locus rate of loss  
185 of polymorphic loci,  $\frac{H_t - H_{t+1}}{H_t}$ , first for each replicate and each generation. Then we averaged, using  
186 the same binning procedure as for population size above and with a bin width of 10. For the full  
187 Ricker model where relatively large carrying capacity is used, the bin width for population size is  
188 50, while that of polymorphic loci is maintained at 10.

189 To calculate early-warning signals (auto-correlation at lag 1, coefficient of variation, skewness and  
190 kurtosis), the population size is first log-transformed due to presence of extreme values and values  
191 close or equal to zero (Dakos et al. 2012). The NAs produced as a result of population extinction

192 are removed before the indicators are computed. Using an overlapping moving window length of 100  
193 generations (200 generations for the Ricker model with larger carrying capacity), we calculate each  
194 indicator for each replicate separately, starting with the 100th generation. Here, the most recent  
195 available 100 data points are used to estimate each indicator at each generation point until the last  
196 generation of population existence. Now, following the same binning procedure described above in  
197 calculating per-capita decline rates, we calculate the indicator from the 100th generation (200th  
198 generation for Ricker model) to population extinction as a function of population size.

## 199 **2.4 Analytic Approximation of Eco-Evolutionary Model**

200 The individual-based model is approximated using a difference equation (for population size dynam-  
201 ics) coupled with a classical diffusion approximation equation (for the allele frequencies). The first  
202 part of the eco-evolutionary model represents the population dynamics as

$$N_{t+1} = E_t W_t N_t, \quad (2.6)$$

203 where  $E_t$  is the average number of offspring per individual given by Equation (2.1) and  $W_t$  is  
204 the average population fitness determined by the distribution  $f(x, t)$ , of allele frequencies,  $x$ , at  
205 generation  $t$ , as outlined below.

206 We approximate  $f(x, t)$  using a diffusion equation (e.g in Kimura et al. (1955))

$$\frac{\partial f(x, t)}{\partial t} = -\frac{\partial [a(x, t)f(x, t)]}{\partial x} + \frac{1}{2} \frac{\partial^2 [b(x, t)f(x, t)]}{\partial x^2}, \quad (2.7)$$

207 where  $a(x, t)$  and  $b(x, t)$  refer to the infinitesimal mean and infinitesimal variance of the change in  
208  $x$ . In the case of heterozygote advantage,  $a(x, t) = sx(1-x)(1-2x)$  and  $b(x, t) = \frac{1}{2N_t}x(1-x)$   
209 (e.g see Durrett (2008)), while in our fluctuating selection scenario,  $a(x, t) = x(1-x)(x(1-2h_t) +$   
210  $h_t)(1 + s_{a,t})(s_a - s_{A,t})$  (see Appendix A.2) and  $b(x, t) = \frac{1}{2N_t}x(1-x)$ .

211 We numerically obtain a complete solution to Equation (2.7) subject to the initial and boundary  
212 conditions as in Zhao et al. (2013) and Xu et al. (2019) (see Appendix Section A.1 for details). In  
213 brief, the allele frequency  $x$  is discretized using a grid with grid points  $x_i = i \cdot u$ , where  $i = 0, 1, \dots, m$   
214 and  $u = 1/m$ . Similarly, time is discretized with spacing  $\tau = 1$  corresponding to a full generation  
215 with grid points  $t_k = v \cdot \tau$ ,  $v = 0, 1, \dots$ . We assume that all loci have initial allele frequency  $x_0$ . The  
216 boundary condition is obtained by imposing the assumption that the system conserves probability  
217 at every time step (sum of all probabilities = 1, for all  $t$ ). Thus, no probability flows outside the  
218 system as loss or fixation of alleles is captured by the outermost bins ( $x = 0$  and  $x = 1$ ). As a final  
219 result, we obtain a vector of probabilities  $f(x_i, t)$  with  $i \in \{0, 1, \dots, m\}$  for each time point.

220 For each time  $t > 0$ , the probability density  $f(x, t)$  is used to estimate



221 (a) the population mean fitness,  $W_t$ . With the assumption of multiplicative fitness across all  $n$   
222 unlinked loci,  $W_t = e^{\sum_{i=1}^n \ln(w(x_i))}$ , where  $w(x)$  is given by Equation 2.3. Because the exact  
223 allele frequency  $x_l$  at a given locus is not explicitly known, we approximate  $W_t$  using the  
224 expectation of fitness at a particular locus over the distribution  $f(x, t)$ . Assuming that  $n$  is  
225 large and all loci independently sample an allele frequency from the current allele-frequency  
226 distribution,

$$W_t = e^{n \sum_{i=0}^m f(x_i, t) \ln w(x_i)}, \quad (2.8)$$

227 where the sum is over all allele-frequency bins, and

228 (b) the probability that both alleles are still present,  $P_t = \sum_{i=1}^{m-1} f(x_i, t)$ . This is then used to  
229 estimate the number of polymorphic loci as,

$$H_t = nP_t. \quad (2.9)$$

230 Note that (2.8) together with (2.6) and the numerical solution for  $f(x, t)$  completes the specification  
231 of the eco-evolutionary model, while  $H_t$  is used as a summary measure of genetic variation at that  
232 time.

## 233 2.5 Data Accessibility

234 All simulations and analyses were done in the *R* programming language (R Core Team 2015) and  
235 the *R* scripts are provided in the supplementary material.

## 236 3 Results

### 237 3.1 Parameter space

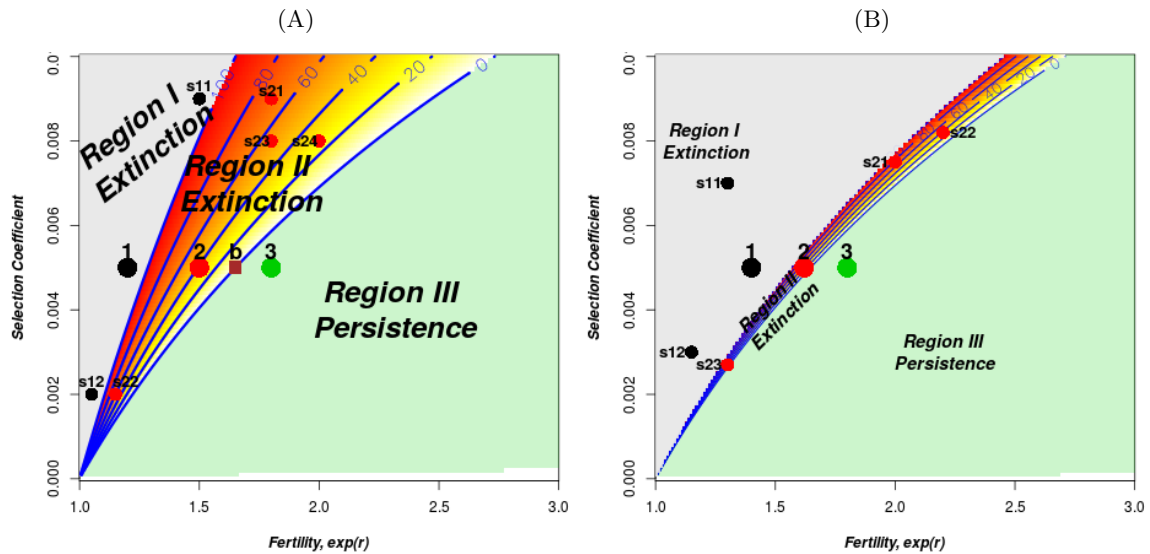

Figure 2: Parameter space divided into three major regions according to whether the population declines even with all loci polymorphic (Region I), starts declining at an intermediate number of polymorphic loci (Region II) or can persist even without polymorphic loci (Region III). (A) is for heterozygote advantage, and (B) is for fluctuating selection (see Section 2.2 for details). The red spectrum and blue lines show the critical number of polymorphic loci below which rapid population decline to extinction occurs. The points numbered 1, 2 and 3 are the cases considered in the main text while the points prefixed with  $s$  are supplementary cases considered in the appendix. The brown square labelled  $b$  is a boundary point in Region III but very close to Region II. The parameters used are  $n = 100$ ,  $c = 0.2$ ,  $\kappa = 50$ ,  $K = 200$ .

238 We generally obtain three distinct regions in the intrinsic growth rate - offspring viability selection  
 239 ( $r - s$ ) plane with qualitatively distinct behavior (Figure 2). Region I consists of populations with  
 240 a critical number of polymorphic loci  $H_c$  above the total number of loci  $n$ . This implies that the  
 241 number of polymorphic loci is below  $H_c$  from the start and populations are expected to decline to  
 242 extinction immediately. In Region III,  $H_c < 0$ . This implies that populations in this region can lose  
 243 all their polymorphic loci without rapid population decline. However, in Region II,  $0 \leq H_c \leq n$ .  
 244 In this region, populations are expected to start to decline faster at some intermediate number of  
 245 polymorphic loci. For fluctuating selection, we observe the same three regions in parameter space  
 246 (Figure 2B), but Region II is more narrow than for the heterozygote advantage mechanism (Figure  
 247 2A). To look at the detailed features in each region, we simulate exemplary cases from each region.  
 248 In this main text, we present results from Cases 1, 2 and 3 and results from cases labelled  $s \cdot \cdot$  are  
 249 given in the appendix.

## 250 3.2 Heterozygote Advantage

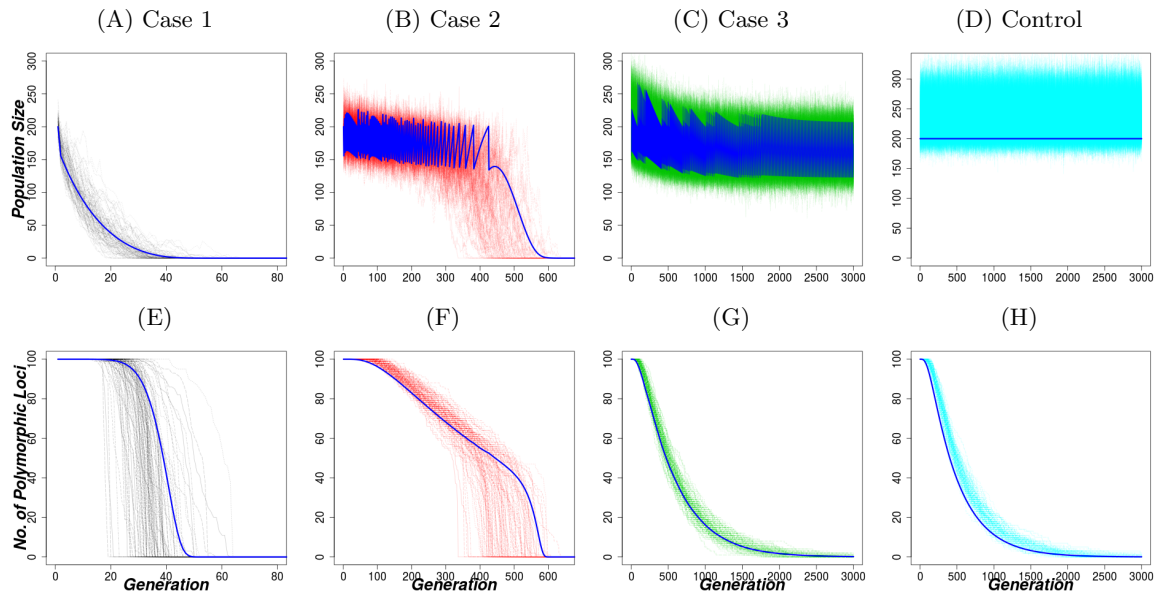

Figure 3: Dynamics of population size and genetic variation under the geometric population growth model with heterozygote advantage. The 1st 3 column panels are for different cases as indicated on Figure 2A. 1st column (Case 1):  $r = \ln(1.2)$ , 2nd column (Case 2):  $r = \ln(1.5)$ , and 3rd column (Case 3):  $r = \ln(1.8)$ . Other parameters are  $s = 0.005$ ,  $N_0 = K = 200$ ,  $replicates = 100$ . 4th column panel is the control case with same parameters as in 2nd column panel but  $s = 0$ . The dark blue lines show the analytic approximation for each case with discretization parameters  $u = 0.1$  and  $\tau = 1$ . Note the different scaling of the time-axis on the different plots.

251 Figure 3 shows population trajectories of Cases 1, 2 and 3 representing Regions I, II and III in Figure  
 252 2A, respectively, and the neutral control case where all genotypes have the maximum fitness of 1.  
 253 The dynamics from the analytic approximations fall within the range of the realisations of the IBM  
 254 in the respective cases (dark blue lines in Figure 3, see Appendix Figure A.1 for the corresponding  
 255 allele-frequency distributions at different times). For Case 1 where fertility is too low to compensate  
 256 for viability selection, populations start their decline to extinction even before losing any genetic  
 257 variation (Figures 3A and 3E). The number of polymorphic loci rapidly decreases to zero at or  
 258 shortly before population extinction. In Case 3 where fertility is high enough to compensate for  
 259 viability selection, even after total loss of polymorphic loci, populations basically fluctuate around  
 260 a population size close to  $K$  (Figures 3C and 3G). However, in Case 2, we observe that populations  
 261 start decreasing slowly with fluctuations until a certain point where they rapidly decline to extinction  
 262 (Figure 3B). Similarly, after a constant phase, polymorphic loci are lost one by one at a small  
 263 rate until a certain number of polymorphic loci is reached and then a rapid loss of all remaining  
 264 polymorphic loci is observed (Figure 3F). The critical number of polymorphic loci below which rapid  
 265 loss occurs roughly matches the estimated number from the analytic parameter space analysis (both  
 266 around 40). These turning points agree with the suggested cue about existence of threshold values  
 267 in levels of genetic variation and population size below which populations suddenly decline rapidly  
 268 to extinction. No such turning points are observed in Cases 1, 3, or the neutral Control case. Also,

269 in line with the proposed cue about similar time scales, we observe that population extinction and  
270 loss of polymorphic loci occur at more or less the same time in Cases 1 and 2. The populations  
271 survive for longer periods of time after total loss of polymorphic loci in both Case 3 and the Control  
272 case scenario (leading to different time scales). In the neutral control, populations simply fluctuate  
273 around  $K$  while polymorphic loci are lost one by one due to drift until complete fixation occurs  
274 (Figures 3D and 3H). Note that the neutral case has the same fertility as Case 2, but although there  
275 is no balancing selection in the neutral case, polymorphism is lost more slowly.

276 Figure 4 shows how the per-capita population decline rates and the per-locus rates of loss of poly-  
277 morphic loci vary with decreasing number of polymorphic loci and declining population size. When  
278 population size is below  $K$ , the per-capita rate of population decline increases with declining popu-  
279 lation size and decreasing number of polymorphic loci for Cases 1 and 2 (Figures 4A and 4B). The  
280 rate is more or less constant (and positive) as population size decreases in Case 1 with a marked  
281 increase near population extinction. In Case 2, the per-capita decline rate increases gradually from  
282 negative to positive as population size (below  $K$ ) and number of polymorphic loci decrease, which  
283 further supports the existence of suggested threshold values of population size and genetic varia-  
284 tion. The negative per-capita decline rate implies positive per-capita growth rate. In Case 3, the  
285 per-capita decline rate is almost constant as both population size and number of polymorphic loci  
286 decrease. Note that the per-capita decline rate is relatively high and positive whenever population  
287 size exceeds  $K$  (grey-shaded region). This is because our geometric model with a Ricker boundary  
288 forces populations to decrease whenever  $N_t > K$  (see Equation (2.1)).

289 Similarly, as population size decreases, the per-locus rate of loss of polymorphic loci first increases  
290 gradually for Case 2 until a certain size is reached where the rate increases suddenly and substantially  
291 (Figure 4C). For Cases 1 and 3, the rate is more or less constant near zero, but when the population  
292 is near extinction, a sudden increase in per-locus rate of loss for Case 1 occurs. Also, as the number  
293 of polymorphic loci decreases, the per-locus rate of loss increases for Cases 1 and 2 but is roughly  
294 constant for Case 3 (Figure 4D). In summary, Cases 1 and 2 match our definition of an an eco-  
295 evolutionary vortex, i.e. per-capita decline rate and per-locus rate of loss increase as both population  
296 size and number of polymorphic loci decrease. Other cases in Regions I and II exhibit the same  
297 features as Case 1 and 2 (see Figure A.4). Cases 3 and the Control scenario, by contrast, do not  
298 match the definition.

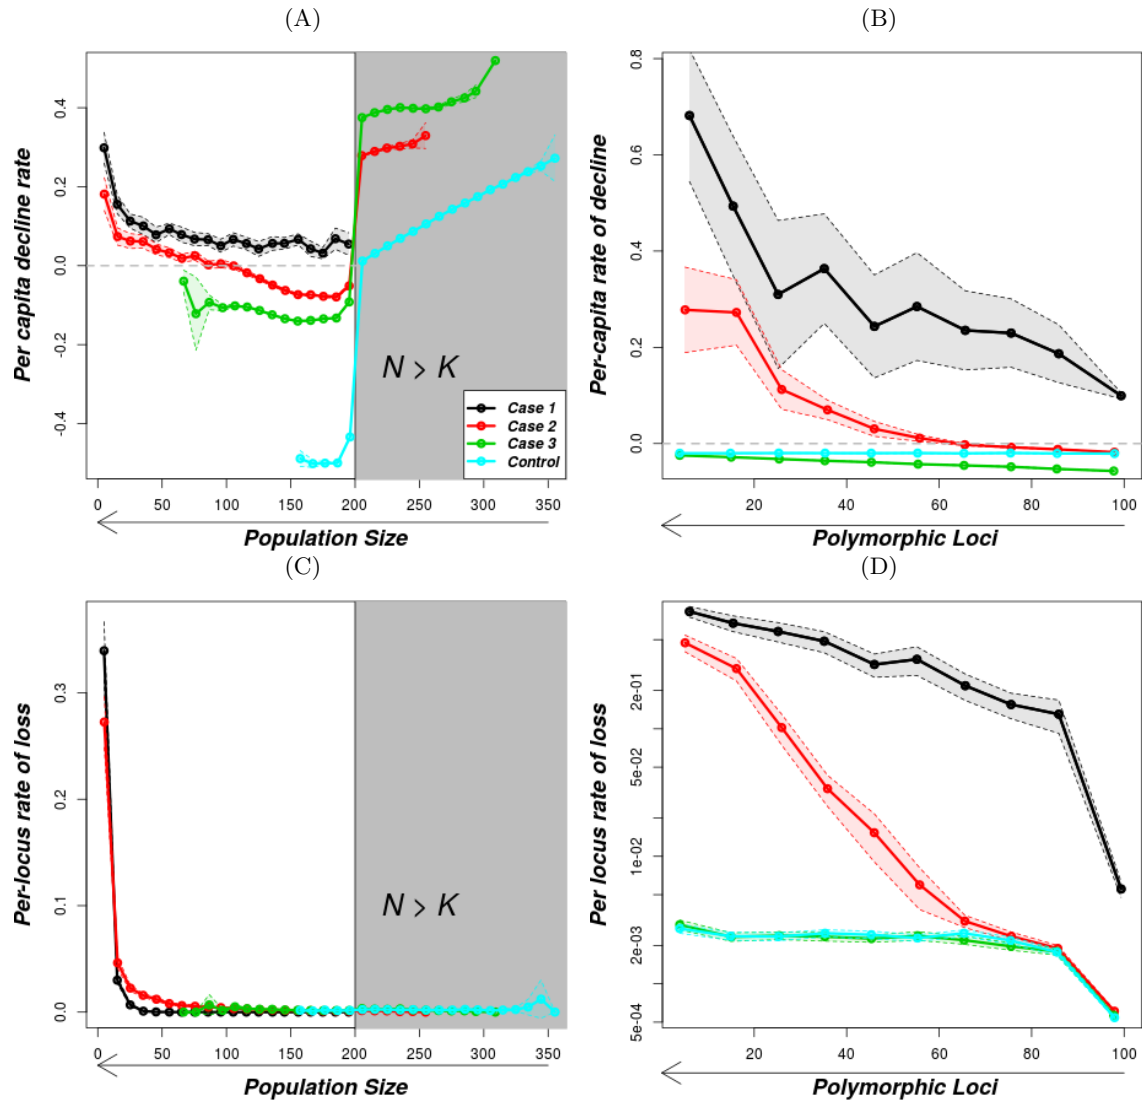

Figure 4: Per-capita rates of population decline and per-locus rates of loss of polymorphic loci under the geometric population growth model with heterozygote advantage. The gray-shaded part in (A) and (C) is the region above  $K$ . The solid lines are the mean values of the rates as described in the methods and the shaded regions shows the standard error. The horizontal gray line in (A) and (C) is for rate 0. The parameters for the 4 cases are as in Figure 3. In (D), the y-axis is on a logarithmic scale. The arrows indicate the long-term direction of change over time.

299 **3.3 Early-Warning Signals**

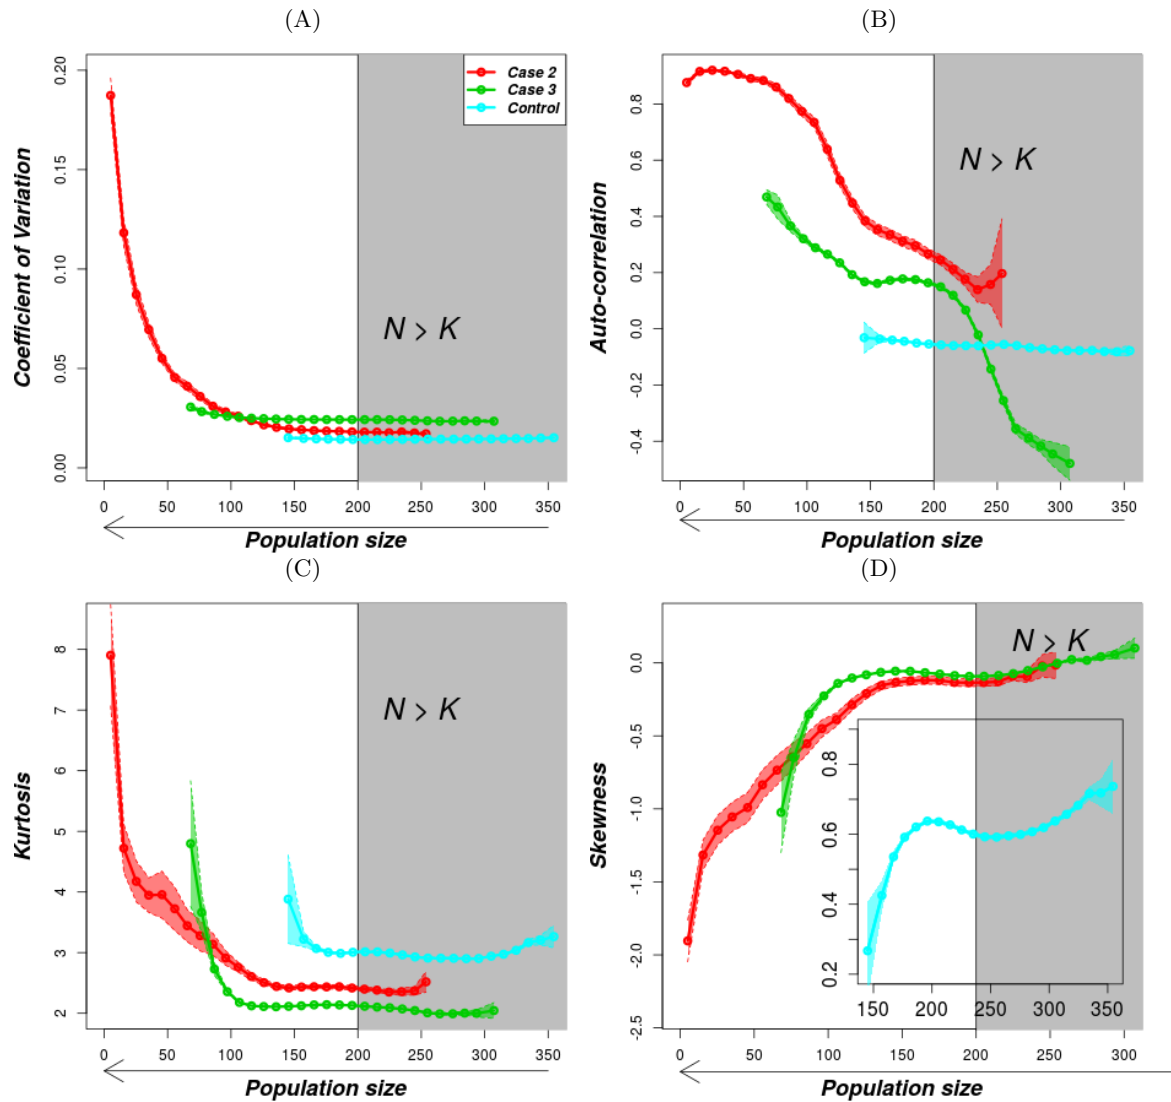

Figure 5: Variation of early-warning signals with population size under the geometric population growth model with heterozygote advantage. The gray-shaded part is the region above  $K$ . The solid lines are the mean values of the rates as described in the methods and the shaded regions shows the standard error while the gray-shaded rectangle is a region above  $K$ . The parameters are as in Figure 3. We leave out Case 1 because the populations rapidly decreased from the start and our time window range is above the time of population extinction. The arrows show direction of population size over time.

300 Figure 5 shows variation of early-warning signals with population size for heterozygote advantage.  
 301 As population size decreases, the early-warning signals display three main phases in Case 2. The  
 302 populations start with a phase where coefficient of variation, kurtosis and skewness remain constant.  
 303 This is followed by a gradual change phase and lastly by a rapid change phase. Autocorrelation  
 304 under heterozygote advantage also shows three phases but in different order (gradual increase, rapid  
 305 decrease, constant). In Case 3 and the Control case, the populations exhibit either one phase where  
 306 the indicator remains constant (coefficient of variation) or two phases where the constant phase  
 307 is followed by a rapid change phase but characterised by large standard errors (kurtosis, skewness

308 and autocorrelation). Gaussian smoothing before estimating the indicators gave similar observations  
309 (see Figure A.6 in the appendix). We deliberately leave out Case 1 because the populations rapidly  
310 declined from the beginning, making early-warning signals pointless, and most of them went extinct  
311 before the length of time window used. For fully density-dependent populations, similar observations  
312 are made (Figure A.11). Note though that compared to these aggregated results for populations in a  
313 given population-size range, time series of individual replicates are more noisy and may not display  
314 clearly distinct phases (see Figure A.5). Among the early-warning signals, the coefficient of variation  
315 seems to produce the most consistent patterns in individual replicates.

### 316 **3.4 Fluctuating Selection with Reversal of Dominance**

317 To check that the above observations are not restricted to the heterozygote advantage selection  
318 mechanism, we now compare the observations with another form of balancing selection known as  
319 fluctuating selection with reversal of dominance (see Figure 1). The dynamics of population size and  
320 number of polymorphic loci as time varies (Figure 6), and per-locus rate of loss and per-capita decline  
321 rate as population size and number of polymorphic loci decrease (see appendix, Figure A.12), show  
322 great similarity to those observed in the corresponding cases for heterozygote advantage. However,  
323 fluctuating patterns in population sizes in Cases 2 and 3 are more pronounced and reflect the patterns  
324 in the population mean fitness in Figure 1. In summary, only Cases 1 and 2 meet our definition of an  
325 eco-evolutionary vortex based on variation of per-capita decline rate and per-locus rate of loss. Also,  
326 in agreement with the proposed cues, this mechanism also shows existence of critical population size  
327 in Case 2 (since per-capita population decline changes from negative to positive as population size  
328 decreases). However, as opposed to heterozygote advantage, the number of polymorphic loci at which  
329 rapid decline to zero occurs varies greatly between trajectories (Figure 6E) with no critical number  
330 of polymorphic loci observed. The analytic approximation gives almost a linear trend with no sign of  
331 a critical number of polymorphic loci. The early-warning signals behaved as expected (Figure A.16),  
332 except that autocorrelation at lag 1 did not show a strong response. Case 3 populations do not meet  
333 our definition of an eco-evolutionary vortex nor show any of the suggested cues.

334 For both selection mechanisms, additional cases in a given region show qualitatively similar results  
335 as their respective representative Cases 1, 2 and 3 (See Figures in Sections A.4.1 and A.6.1 in the  
336 appendix).

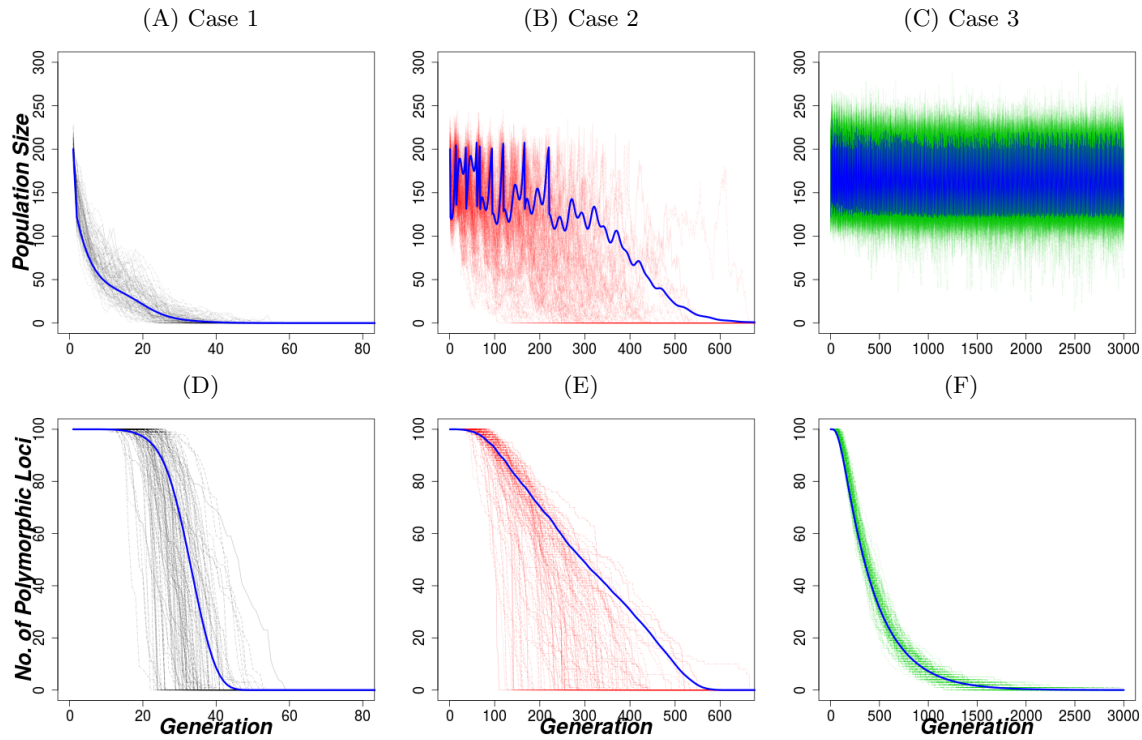

Figure 6: Dynamics of population size and genetic variation under the geometric population growth model with fluctuating selection and reversal of dominance. Each column represents one case indicated in Figure 2B. 1st column (Case 1):  $r = \ln(1.4)$ , 2nd column (Case 2):  $r = \ln(1.616)$  and 3rd column (Case 3):  $r = \ln(1.8)$ . Other parameters are  $s = 0.005$ ,  $N_0 = K = 200$ ,  $replicates = 100$ . The blue line is the corresponding analytic approximation with discretization parameters  $u = 0.1$  and  $\tau = 1$ . Notice the different scaling of the time-axis in the different columns.

## 337 4 Discussion

338 We have developed a quantitative model for the feedback between loss of genetic variation and popu-  
 339 lation decline. We identified parameter combinations that match our definition of an eco-evolutionary  
 340 vortex and where populations exhibit the proposed cues of such extinction vortices. Our approach  
 341 involved dividing parameter space into regions displaying qualitatively different behaviours as both  
 342 population size and genetic variation decrease.

343 Parameter combinations in Regions I and II (see Figure 2) show clear interdependence between  
 344 population size and genetic variation. They both agree with the proposed two defining features of  
 345 an eco-evolutionary vortex, i.e. the per-capita rates of population decline and the per-locus rates  
 346 of loss of polymorphic loci increase with both decreasing population size and decreasing number  
 347 of polymorphic loci. Region III and the neutral Control did not match the defining features of an  
 348 extinction vortex. Also, among the suggested cues, populations in Region I and II do not survive  
 349 for long once total loss of genetic variation occurs (as seen from the trajectories). Further, only  
 350 populations in Region II exhibits early-warning signals (see Section 4.1 below) and a critical number  
 351 of polymorphic loci and population size below which a rapid population decline to extinction occurs.  
 352 These critical values occur when the average number of offspring that survive per individual ( $SOI$ )



353 falls below 1 (see also Section A.3 in the appendix). Note that in our models the threshold number of  
354 polymorphic loci is higher than the critical number calculated from  $SOI = 1$  due to overestimation  
355 of fitness by assuming allele frequency of 0.5. Region III populations do well even after total loss  
356 of genetic variation and generally do not match our definition and suggested cues. However, for  
357 parameter combinations close to the boundary of Region II, the populations may not survive for  
358 long after (total) loss of polymorphic loci (see Figure A.8C), and also satisfy both suggested defining  
359 features of an eco-evolutionary vortex. This is because loss of polymorphic loci lowers the populations  
360 to very low sizes which exposes them to strong demographic stochasticity (Harmon and Braude 2010).  
361 Furthermore, in Region II, the increasing per-capita decline rate as population size and polymorphic  
362 loci decrease can be seen as a genetic Allee effect. That is, we have a positive relationship between  
363 per-capita growth rate and population size at low population sizes (the hallmark of a demographic  
364 Allee effect), mediated by faster loss of genetic variation at small population sizes. Our definition  
365 of a genetic Allee effect roughly matches the two-step definition suggested by Luque et al. (2016),  
366 although in our case the first step is not a reduction in population size but loss of genetic variation.  
367 As drift pushes allele frequencies to the extremes, polymorphic loci start to be lost one by one.  
368 This leads to a decrease in individual fitness (decreased number of surviving offspring) and thereby  
369 population size. Wittmann et al. (2018) defined genetic Allee effects in terms of thresholds. A strong  
370 genetic Allee effect produces an inflection point in the persistence probability graph as a function of  
371 initial population size. In our study, the change in per-capita decline rate from negative to positive  
372 similarly suggests the existence of an eco-evolutionary Allee effect threshold.

373 The analytic approximation agrees with the simulations of the IBM in three ways: (1) The shape of  
374 individual replicates and analytic approximation is the same. (2) The approximation trajectory lies  
375 in the region of possible individual-based model trajectories. (3) The critical number of polymorphic  
376 loci is roughly the same, at least under heterozygote advantage. Thus for many purposes it may be  
377 possible to use the analytic model, which is computationally less demanding than the individual-  
378 based model, as a short-cut to derive results on eco-evolutionary extinction vortices.

## 379 4.1 Early-warning signals

380 The aim of checking for early-warning signals in this study was to find out whether signals can be  
381 observed before a population enters an extinction vortex. All the indicators behaved as expected  
382 for declining populations (Sommer et al. 2017; Dakos et al. 2012). As population size decreases, the  
383 populations show generally three phases for cases where reduction in genetic variation results into  
384 population extinction (e.g. Region II). That is, an initial constant phase followed by a gradual (linear)  
385 change phase and finally a rapid change phase can be observed. Again with regards to our suggested  
386 cue that decreasing genetic variation produces early-warning signals in population dynamics, the

387 start of the gradual change phase signals the entry into a vortex while the start of the rapid phase  
388 signals nearby extinction. For Region 3, populations generally show one or two phases. The constant  
389 phase and either a gradual phase or a rapid phase. But with a rapid change phase, there are relatively  
390 large standard errors. It should be noted that decisions should not depend on a single early-warning  
391 signal but a combination of them, as results from indicators may not always agree with each other  
392 (Gsell et al. 2016). Also, some signals were relatively noisy in individual replicates or only appeared  
393 when the population was already very low. As population size decreases, we find changes in signals  
394 from coefficient of variation/standard deviation, skewness and kurtosis consistent with each other  
395 and also with the changes in per-capita decline rates. However, autocorrelation shows inconsistency  
396 with other measured indicators.

## 397 **4.2 Generality and genetic realism**

398 Small populations whose persistence is mainly driven by genetic factors are usually thought to be  
399 far below their environmental carrying capacity and little affected by negative density dependence  
400 (Lynch and Gabriel 1990; Kim et al. 2016; Wang et al. 2019). Here, we used the geometric model with  
401 a Ricker boundary to mimic such populations. To check whether our observations are not an artifact  
402 of this assumption, we also used a Ricker model to study fully density-dependent populations. We  
403 observe comparable features as shown in Figures A.7 and A.8. However, a higher  $K$  is required to  
404 observe rapid population decline in Region II (Figure A.8). The high  $K$  allows for sufficiently weak  
405 negative density-dependence so that the positive feedback induced by the loss of genetic variation  
406 can dominate and cause a rapid decline to extinction (see Appendix section A.5 for analogous figures  
407 and more discussion).

408 The variation of per-locus rates of loss of polymorphic loci with population size and polymorphic  
409 loci agree with observations in extinction vortices driven by accumulation of deleterious mutations.  
410 Models that consider (deleterious) mutation accumulation show that the rate at which new mutations  
411 get fixed increases with increasing number of such mutations already fixed (Coron et al. 2013). Also,  
412 Lynch and Gabriel (1990) observed that an extinction vortex due to mutation accumulation leads  
413 to a small coefficient of variation in extinction times. In our model, the coefficient of variation  
414 for population extinction time for regions with extinction vortex is also substantially below 1 (1  
415 being the expectation with exponentially distributed extinction times). For fluctuating selection,  
416 the coefficients of variation of extinction times for the two cases 1 and 2 are 0.22 and 0.35 while for  
417 heterozygote advantage, the coefficients are 0.22 and 0.13 for Cases 1 and 2 respectively.

418 Various forms of balancing selection such as negative frequency-dependent selection, heterozygote  
419 advantage and some types of fluctuating selection contribute to maintaining genetic variation in  
420 populations. In our study, both mechanisms for the maintenance of genetic variation are based on

421 heterozygote advantage directly or indirectly in the long run. These mechanisms create a positive  
422 relationship between the number of polymorphic loci and fitness. Other mechanisms that have a  
423 similar relationship might produce similar eco-evolutionary vortices. Future models with mecha-  
424 nisms that are not based on heterozygote advantage such as frequency-dependent selection or more  
425 generally evolutionary potential in a variable environment are necessary to check the generality of  
426 the above eco-evolutionary vortex.

427 The model presented here assumes that polymorphism that is lost is lost forever. This is a good  
428 approximation if the time scale of extinction is short relative to the time scale at which mutations  
429 occur. However, to study if there is a critical population size above which populations are safe  
430 from an eco-evolutionary vortex, future work will need to include back-mutations or compensatory  
431 mutations.

### 432 **4.3 Acknowledgements**

433 We thank the Theoretical Biology group, Bielefeld University for the discussions and generously  
434 sharing insights especially Koen van Benthem on early-warning signals.

## 435 **References**

- 436 Ballou, J., and K. Ralls. 1982. Inbreeding and juvenile mortality in small populations of ungulates:  
437 a detailed analysis. *Biological Conservation* 24:239–272.
- 438 Bensch, S., H. Andrén, B. Hansson, H. C. Pedersen, H. Sand, D. Sejberg, P. Wabakken, M. Åkesson,  
439 and O. Liberg. 2006. Selection for heterozygosity gives hope to a wild population of inbred wolves.  
440 *PloS One* 1:e72.
- 441 Benson, J. F., P. J. Mahoney, T. W. Vickers, J. A. Sikich, P. Beier, S. P. Riley, H. B. Ernest,  
442 and W. M. Boyce. 2019. Extinction vortex dynamics of top predators isolated by urbanization.  
443 *Ecological Applications* 29:e01868.
- 444 Bertram, J., and J. Masel. 2019. Different mechanisms drive the maintenance of polymorphism at  
445 loci subject to strong versus weak fluctuating selection. *Evolution* 73:883–896.
- 446 Blomqvist, D., A. Pauliny, M. Larsson, and L.-Å. Flodin. 2010. Trapped in the extinction vortex?  
447 Strong genetic effects in a declining vertebrate population. *BMC Evolutionary Biology* 10:33.
- 448 Chen, J., V. Nolte, and C. Schlötterer. 2015. Temperature stress mediates decanalization and dom-  
449 inance of gene expression in *Drosophila melanogaster*. *PLoS Genetics* 11:e1004883.
- 450 Connallon, T., and S. F. Chenoweth. 2019. Dominance reversals and the maintenance of genetic  
451 variation for fitness. *PloS Biology* 17:e3000118.

- 452 Coron, C., S. Méléard, E. Porcher, and A. Robert. 2013. Quantifying the mutational meltdown in  
453 diploid populations. *The American Naturalist* 181:623–636.
- 454 Courchamp, F., E. Angulo, P. Rivalan, R. J. Hall, L. Signoret, L. Bull, and Y. Meinard. 2006. Rarity  
455 value and species extinction: The anthropogenic Allee effect. *PloS Biology* 4:e415.
- 456 Curtsinger, J. W., P. M. Service, and T. Prout. 1994. Antagonistic pleiotropy, reversal of dominance,  
457 and genetic polymorphism. *The American Naturalist* 144:210–228.
- 458 Dakos, V., and J. Bascompte. 2014. Critical slowing down as early warning for the onset of collapse  
459 in mutualistic communities. *Proceedings of the National Academy of Sciences* 111:17546–17551.
- 460 Dakos, V., S. R. Carpenter, W. A. Brock, A. M. Ellison, V. Guttal, A. R. Ives, S. Kefi, V. Livina,  
461 D. A. Seekell, E. H. van Nes, et al. 2012. Methods for detecting early warnings of critical transitions  
462 in time series illustrated using simulated ecological data. *PloS One* 7:e41010.
- 463 de Silva, S., and P. Leimgruber. 2019. Demographic tipping points as early indicators of vulnerability  
464 for slow-breeding megafaunal populations. *Frontiers in Ecology and Evolution* 7:171.
- 465 Drake, J. M., and B. D. Griffen. 2010. Early warning signals of extinction in deteriorating environ-  
466 ments. *Nature* 467:456–459.
- 467 Durrett, R. 2008. Probability models for DNA sequence evolution. Springer Science & Business  
468 Media.
- 469 Fagan, W. F., and E. Holmes. 2006. Quantifying the extinction vortex. *Ecology Letters* 9:51–60.
- 470 Frankham, R. 2005. Genetics and extinction. *Biological Conservation* 126:131–140.
- 471 Gilpin, M. E., and M. E. Soulé. 1986. Minimal viable populations: processes of species extinction.  
472 *Conservation Biology: the science of scarcity and diversity* pages 19–34.
- 473 Grieshop, K., and G. Arnqvist. 2018. Sex-specific dominance reversal of genetic variation for fitness.  
474 *PloS Biology* 16:e2006810.
- 475 Gsell, A. S., U. Scharfenberger, D. Özkundakci, A. Walters, L.-A. Hansson, A. B. Janssen, P. Nöges,  
476 P. C. Reid, D. E. Schindler, E. Van Donk, et al. 2016. Evaluating early-warning indicators of  
477 critical transitions in natural aquatic ecosystems. *Proceedings of the National Academy of Sciences*  
478 113:E8089–E8095.
- 479 Harmon, L. J., and S. Braude. 2010. Conservation of small populations: effective population sizes,  
480 inbreeding, and the 50/500 rule. *An introduction to methods and models in ecology, evolution,  
481 and conservation biology* pages 125–138.

- 482 Jarvis, L., K. McCann, T. Tunney, G. Gellner, and J. M. Fryxell. 2016. Early warning signals detect  
483 critical impacts of experimental warming. *Ecology and Evolution* 6:6097–6106.
- 484 Kim, B.-J., B.-K. Lee, H. Lee, and G.-S. Jang. 2016. Considering threats to population viability of  
485 the endangered Korean long-tailed goral (*Naemorhedus caudatus*) using VORTEX. *Animal Cells*  
486 *and Systems* 20:52–59.
- 487 Kimura, M., et al. 1955. Stochastic processes and distribution of gene frequencies under natural  
488 selection. *Cold Spring Harbor Symposia on Quantitative Biology* 20:33–53.
- 489 Lacy, R. C. 1993. VORTEX - a computer simulation model for population viability analysis. *Wildlife*  
490 *Research* 20:45–65.
- 491 Luque, G. M., C. Vayssade, B. Facon, T. Guillemaud, F. Courchamp, and X. Fauvergue. 2016. The  
492 genetic Allee effect: a unified framework for the genetics and demography of small populations.  
493 *Ecosphere* 7:e01413.
- 494 Lynch, M., and W. Gabriel. 1990. Mutation load and the survival of small populations. *Evolution*  
495 44:1725–1737.
- 496 Miller, W., V. M. Hayes, A. Ratan, D. C. Petersen, N. E. Wittekindt, J. Miller, B. Walenz, J. Knight,  
497 J. Qi, F. Zhao, et al. 2011. Genetic diversity and population structure of the endangered marsupial  
498 *Sarcophilus harrisii* (Tasmanian devil). *Proceedings of the National Academy of Sciences of the*  
499 *United States of America* 108:12348–12353.
- 500 Palomares, F., J. A. Godoy, J. V. López-Bao, A. Rodríguez, S. Roques, M. Casas-Marce, E. Revilla,  
501 and M. Delibes. 2012. Possible extinction vortex for a population of Iberian lynx on the verge of  
502 extirpation. *Conservation Biology* 26:689–697.
- 503 R Core Team. 2015. *R: A Language and Environment for Statistical Computing*. R Foundation for  
504 Statistical Computing, Vienna, Austria.
- 505 Ralls, K., K. Brugger, and J. Ballou. 1979. Inbreeding and juvenile mortality in small populations  
506 of ungulates. *Science* 206:1101–1103.
- 507 Reed, D. H., and R. Frankham. 2003. Correlation between fitness and genetic diversity. *Conservation*  
508 *Biology* 17:230–237.
- 509 Saccheri, I., M. Kuussaari, M. Kankare, P. Vikman, W. Fortelius, and I. Hanski. 1998. Inbreeding  
510 and extinction in a butterfly metapopulation. *Nature* 392:491–494.
- 511 Sommer, S., K. J. van Benthem, D. Fontaneto, and A. Ozgul. 2017. Are generic early-warning signals  
512 reliable indicators of population collapse in rotifers? *Hydrobiologia* 796:111–120.

- 513 Spielman, D., B. W. Brook, D. A. Briscoe, and R. Frankham. 2004. Does inbreeding and loss of  
514 genetic diversity decrease disease resistance? *Conservation Genetics* 5:439–448.
- 515 Tanaka, Y. 1997. Extinction of populations due to inbreeding depression with demographic distur-  
516 bances. *Researches on Population Ecology* 39:57–66.
- 517 ———. 1998. Theoretical aspects of extinction by inbreeding depression. *Population Ecology* 40:279–  
518 286.
- 519 ———. 2000. Extinction of populations by inbreeding depression under stochastic environments.  
520 *Population Ecology* 42:55–62.
- 521 Wang, T., M. Fujiwara, X. Gao, and H. Liu. 2019. Minimum viable population size and population  
522 growth rate of freshwater fishes and their relationships with life history traits. *Scientific Reports*  
523 9:3612.
- 524 Wittmann, M. J., A. O. Bergland, M. W. Feldman, P. S. Schmidt, and D. A. Petrov. 2017. Seasonally  
525 fluctuating selection can maintain polymorphism at many loci via segregation lift. *Proceedings of*  
526 *the National Academy of Sciences* 114:E9932–E9941.
- 527 Wittmann, M. J., H. Stuis, and D. Metzler. 2018. Genetic Allee effects and their interaction with  
528 ecological Allee effects. *Journal of Animal Ecology* 87:11–23.
- 529 Xu, S., M. Chen, C. Liu, R. Zhang, and X. Yue. 2019. Behavior of different numerical schemes for  
530 random genetic drift. *BIT Numerical Mathematics* pages 1–25.
- 531 Zhao, L., X. Yue, and D. Waxman. 2013. Complete numerical solution of the diffusion equation of  
532 random genetic drift. *Genetics* 194:973–985.

## 533 Appendices

### 534 A Supplementary Information

#### 535 A.1 Diffusion Approximation of Allele-Frequency Distribution

536 The probability density function,  $f(x, t)$  of allele frequency  $x$  at time  $t$  can be approximated using  
537 a forward Kolmogorov equation

$$\frac{\partial f(x, t)}{\partial t} = -\frac{\partial [a(x, t)f(x, t)]}{\partial x} + \frac{1}{2} \frac{\partial^2 [b(x, t)f(x, t)]}{\partial x^2}, \quad (\text{A.1})$$

538 where  $a(x, t)$  and  $b(x, t)$  are the infinitesimal mean and infinitesimal variance of allele frequency  $x$ ,  
539 at time  $t$  (Kimura et al. 1955). Subject to the initial and boundary conditions, Equation (A.1) can  
540 be solved numerically and in some cases analytically.

541 In the case of heterozygote advantage with both homozygotes having fitness of  $1 - s$ , where  $s > 0$   
542 and heterozygotes having fitness 1, then, it can be shown that

$$a(x, t) = sx(1 - x)(1 - 2x) \quad (\text{A.2})$$

$$b(x, t) = \frac{1}{2N_t}x(1 - x). \quad (\text{A.3})$$

543 In this study, we solve the diffusion equation numerically adopting the scheme in Zhao et al. (2013)  
544 and Xu et al. (2019) without rescaling time. The numerical method gives a complete solution of  
545 the problem, i.e., it keeps the law of total probability at all times. The solution is based on Finite  
546 Volume Methods (FVM) using a central scheme (function values approximated in the middle of a  
547 set of grid cells). We briefly describe the main steps followed here.

548 The boundary condition stems from conservation of total probability at every time  $t$ . We assume  
549 zero flux density at the boundaries, i.e., no probability flow outside the system as the probability of  
550 fixation or loss is captured by the outermost bins. To see this, we first rewrite Equation (A.1) in the  
551 form

$$\frac{\partial f(x, t)}{\partial t} + \frac{\partial J(x, t)}{\partial x} = 0, \quad (\text{A.4})$$

552 where

$$J(x, t) = a(x, t)f(x, t) - \frac{1}{2} \frac{\partial [b(x, t)f(x, t)]}{\partial x} \quad (\text{A.5})$$

553 represents a probability flow. Thus the boundary condition requires that

$$J(0, t) = J(1, t) = 0. \quad (\text{A.6})$$

554 The initial condition is obtained by assuming the populations start at a single allele frequency  $x_0$ .

555 Thus  $f(x, 0) = x_0$ , represented by a Dirac function whose mass is concentrated at  $x = x_0$ .

556 We discretize  $x$  into a grid with spacing  $u = 1/m$ . That is  $x_i = i \cdot u$ ,  $i = 0, 1, \dots, m$ . Also, time is

557 discretized with spacing  $\tau$  and the grid points are  $t_v = v \cdot \tau$ ,  $v = 0, 1, \dots$ . The control volume  $D_i$ ,

558 for the inner mesh points  $x_i$  is given by

$$D_i = \{x | x_{i-\frac{1}{2}} \leq x \leq x_{i+\frac{1}{2}}\}, \quad 1 \leq i \leq m-1,$$

559 where  $x_{i+\frac{1}{2}}$  is the grid mid-point between  $x_i$  and  $x_{i+1}$ .

560 Equation (A.4) can then be approximated using FVM by

$$\frac{f_i^{v+1} - f_i^v}{\tau} + \frac{J_{i+\frac{1}{2}}^{v+1} - J_{i-\frac{1}{2}}^{v+1}}{u} = 0, \quad (\text{A.7})$$

561 where  $J_\bullet$  is approximated using a central scheme as

$$J_{i+\frac{1}{2}}^{v+1} = \frac{a_{i+1}f_{i+1}^{v+1} + a_i f_i^{v+1}}{2} - \frac{b_{i+1}f_{i+1}^{v+1} - b_i f_i^{v+1}}{u} \quad \text{and}, \quad (\text{A.8})$$

$$J_{i-\frac{1}{2}}^{v+1} = \frac{a_i f_i^{v+1} + a_{i-1} f_{i-1}^{v+1}}{2} - \frac{b_i f_i^{v+1} - b_{i-1} f_{i-1}^{v+1}}{u}. \quad (\text{A.9})$$

562 Substituting (A.8) and (A.9) for  $1 \leq i \leq m-1$ , into Equation (A.7) and after some algebra, we get

$$\alpha f_{i+1}^{v+1} + \gamma f_i^{v+1} - \beta f_{i-1}^{v+1} = \frac{1}{\tau} f_i^v, \quad (\text{A.10})$$

563 where

$$\alpha = \frac{a_{i+1}}{2u} - \frac{b_{i+1}}{u^2}, \quad \gamma = \frac{1}{\tau} + \frac{2b_i}{u^2} \quad \text{and} \quad \beta = \frac{b_{i-1}}{u^2} + \frac{a_{i-1}}{2u}$$

564 At the boundaries, the mesh points  $x_0 = 0$  and  $x_m = 1$  have the control volume

$$D_0 = \{x | 0 \leq x \leq x_{\frac{1}{2}}\} \quad \text{and} \quad D_m = \{x | x_{m-\frac{1}{2}} \leq x \leq 1\} \quad \text{respectively.}$$



565 Now, using the boundary condition given in (A.6),

$$\frac{f_0^{v+1} - f_0^v}{\tau} + \frac{2J_{\frac{1}{2}}^{v+1}}{u} = 0, \quad x_0 = 0 \quad (\text{A.11})$$

$$\frac{f_m^{v+1} - f_m^v}{\tau} - \frac{2J_{m-\frac{1}{2}}^{v+1}}{u} = 0, \quad x_m = 1, \quad (\text{A.12})$$

566 which after some rearrangement yields

$$\rho f_1^{v+1} + \frac{1}{\tau} f_0^{v+1} = \frac{1}{\tau} f_0^v, \quad x_0 = 0, \quad (\text{A.13})$$

$$\frac{1}{\tau} f_m^{v+1} - \sigma f_{m-1}^{v+1} = \frac{1}{\tau} f_m^v, \quad x_m = 1, \quad (\text{A.14})$$

567 where

$$\rho = \frac{a_1}{u} - \frac{2b_1}{u^2} \quad \text{and} \quad \sigma = \frac{a_{m-1}}{u} + \frac{2b_{m-1}}{u^2}.$$

568 Combining Equations (A.10), (A.13) and (A.14) yields a system of difference equations generally  
569 expressed in matrix form as

$$\mathbf{M}^{v+1} f^{v+1} = \mathbf{D} f^v, \quad (\text{A.15})$$

570 where  $\mathbf{D}$  is a  $(m+1) \times (m+1)$  diagonal matrix whose leading diagonal is filled with  $\frac{1}{\tau}$  and  $\mathbf{M}$  is  
571 also a  $(m+1) \times (m+1)$  tridiagonal matrix filled as follows. For  $i = 0$  and  $i = m$

$$\mathbf{M}[1, 1] = \frac{1}{\tau}, \quad \mathbf{M}[1, 2] = \rho, \quad \mathbf{M}[m, m-1] = -\sigma, \quad \text{and} \quad \mathbf{M}[m, m] = \frac{1}{\tau}. \quad (\text{A.16})$$

572 For  $1 \leq i \leq m-1$ ,

$$\mathbf{M}[i, i] = \gamma, \quad \mathbf{M}[i, i-1] = -\beta \quad \text{and} \quad \mathbf{M}[i, i+1] = \alpha. \quad (\text{A.17})$$

573 For a detailed discussion of this numerical scheme, see Zhao et al. (2013) and Xu et al. (2019). The  
574 density of allele frequencies at time-step  $v+1$  given the density at time-step  $v$  is

$$f^{v+1} = (\mathbf{M}^{v+1})^{-1} \times \mathbf{D} \times f^v. \quad (\text{A.18})$$

575 The densities of allele frequencies for some of the scenarios considered in the main text are shown  
576 in Figure A.1.

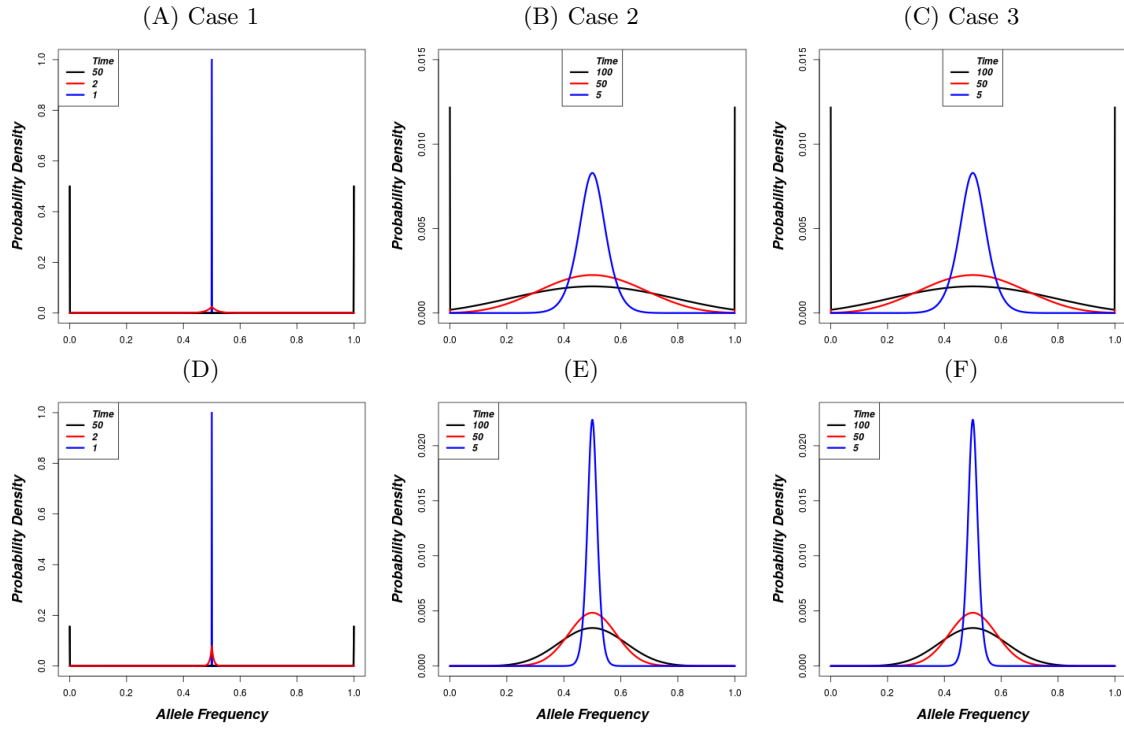

Figure A.1: Probability density of allele frequencies  $f(x, t)$  at different times for heterozygous advantage. First row: Geometric model with  $N_0 = K = 200$ . 2nd row: Ricker model with  $N_0 = K = 2000$ . Other parameters are the same for both rows i.e.  $s = 0.005, x_0 = 0.5, m = 1000, \tau = 1$ .

## 577 A.2 Infinitesimal Mean for Fluctuating Selection

578 Consider the three genotypes  $AA$ ,  $Aa$  and  $aa$  with fitness  $1 - s_{A,t}$ ,  $1 - h_t s_{A,t} - (1 - h_t) s_{a,t}$  and  
 579  $1 - s_{a,t}$  at time  $t$ , respectively, where  $h_t, s_{a,t}$  and  $s_{A,t}$  are as described in the main text (Section 2).  
 580 Also, we assume the frequency of allele  $A$  is  $x_t$  at time  $t$ . For convenience, we drop subscript  $t$  in  
 581 the allele frequency and in the selection and dominance coefficients. After the action of selection,  
 582 the allele frequency in the next generation  $x'$  is

$$x' = \frac{x^2(1 - s_A) + x(1 - x)(1 - h s_A - (1 - h) s_a)}{F_M}, \quad (\text{A.19})$$

583 where  $F_M$  is the mean fitness given by

$$F_M = 1 - s_a + x(s_a - s_A)(x(1 - 2h) + 2h). \quad (\text{A.20})$$

584 After some algebra, the change in allele frequency  $a(x, t) = x' - x$  is

$$a(x, t) = \frac{[x(1 - x)(s_a - s_A)(x(1 - 2h) + h)]}{F_M}. \quad (\text{A.21})$$

585 Using a Taylor series expansion

$$a(x, t) = x(1-x)(s_a - s_A)(x(1-2h) + h)\{1 + s_a - x(s_a - s_A)(x(1-2h) + 2h) + \mathcal{O}((s_a - x(s_a - s_A)(x(1-2h) + 2h))^2)\}$$

586 Assuming the coefficients  $s_a$  and  $s_A$  are small and ignoring terms with 3rd order and above in the  
587 expansion yields

$$a(x, t) = x(1-x)(s_a - s_A)(x(1-2h) + h)(1 + s_a) - x^2(1-x)(s_a - s_A)^2(x(1-2h) + h)(x(1-2h) + 2h). \quad (\text{A.22})$$

### 588 **A.3 Number of Offspring that Survive per Parent (SOI)**

589 The number of offspring that survive are given by

$$SOI(H, N) = W(H)E(N). \quad (\text{A.23})$$

590 Differentiating  $SOI$  with respect to  $H$ ,

$$\frac{dSOI}{dH} = \ln\left(\frac{1 - \frac{s}{2}}{1 - s}\right) SOI, \quad (\text{A.24})$$

591 shows that the number of offspring that survives increases with  $H$  and the second derivative of  $SOI$

$$\frac{d^2SOI}{dH^2} = \left(\ln\left(\frac{1 - \frac{s}{2}}{1 - s}\right)\right)^2 SOI, \quad (\text{A.25})$$

592 is positive. This implies that  $SOI$  increases even faster as  $H$  increases.

593 Simulations show that the decline in population size and loss of polymorphic loci becomes faster  
594 when the number surviving offspring per individual is just less than 1. Assuming  $N \ll K$  and  
595 therefore  $\frac{N}{K} \approx 0$  so that we can assume that  $E(N) \approx e^r$ , we obtain  $H_c$ , the critical number of  
596 polymorphic loci for  $SOI = 1$  as

$$H_c = \frac{-r - n \ln(1 - s)}{\ln\left(\frac{1 - \frac{s}{2}}{1 - s}\right)} \quad (\text{A.26})$$

597 If the ratio of population size and carrying capacity is not small enough to be negligible, then  $E_t$   
598 follows the pure Ricker model dynamics, making  $SOI$  a function of  $N$ . Differentiating  $SOI$  with

599 respect to  $N$  gives

$$\frac{dSOI}{dN} = -\frac{r}{K}W(H)E(N). \quad (\text{A.27})$$

600 Equation (A.27) shows that  $SOI$  increases as  $N$  decreases at constant  $H$ . The second derivative  
601 with respect to  $N$  is positive implying that  $SOI$  increases even faster as  $N$  decreases. As earlier seen  
602 in Equations (A.24) and (A.25),  $SOI$  decreases faster with decrease in  $H$ . So, the net direction of  
603  $SOI$  depends on how fast  $SOI$  decreases with decreasing  $H$  and increases with decreasing  $N$ . Small  
604 values of  $r$  combined with higher values of  $s$  would result into net decrease in  $SOI$  and when below  
605 1, the population accelerates to extinction.

606 **A.4 Supplementary figures on the geometric growth model with het-**  
607 **erozygote advantage**

608 **A.4.1 Other Randomly Chosen Points in Regions I and II**

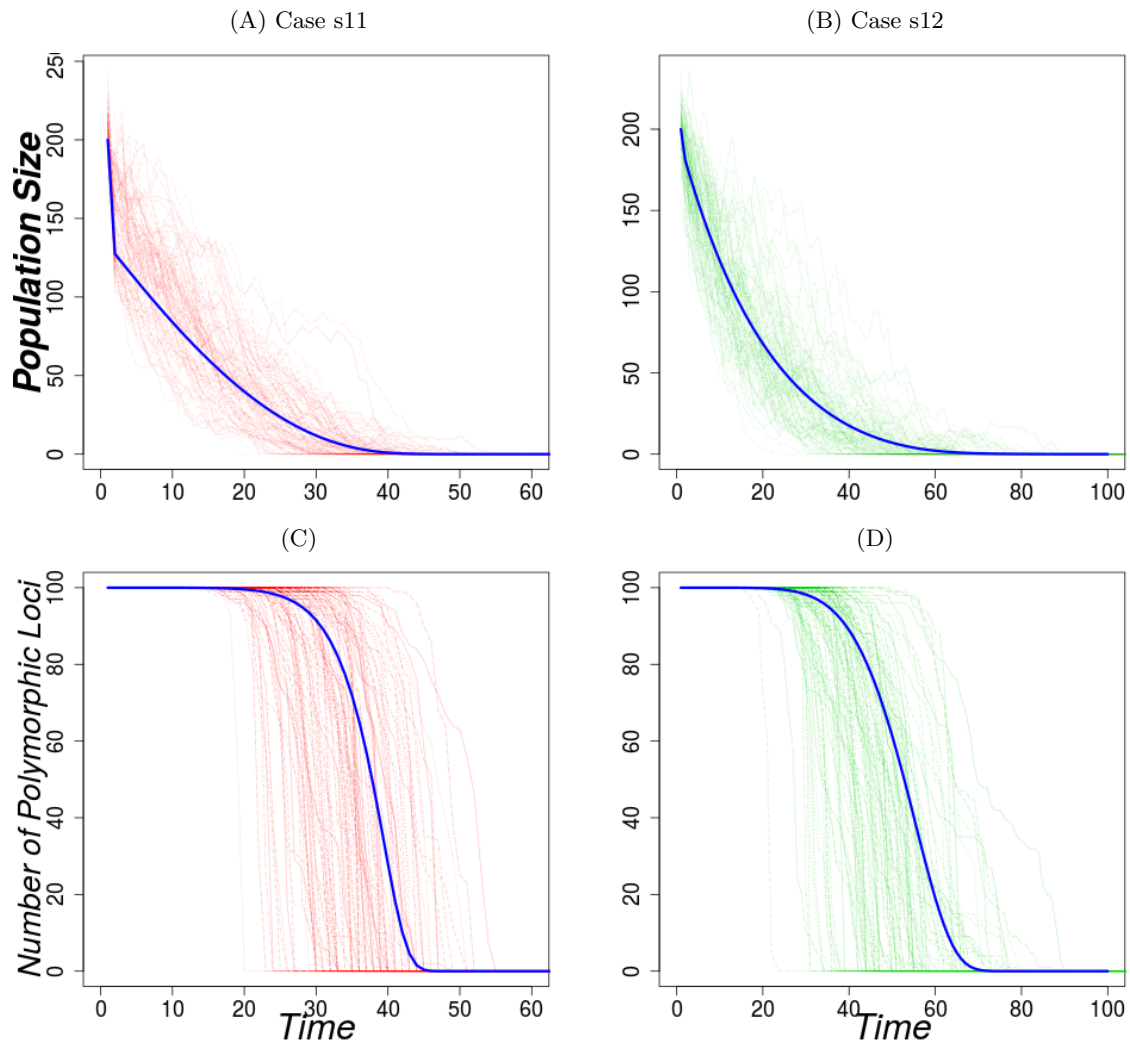

Figure A.2: Variation of the population size and the number of polymorphic loci with time under the geometric growth model with heterozygote advantage for Region I supplementary points. The dark blue lines show the analytic approximation with discretization parameters  $u = 0.1$  and  $\tau = 1$ . The parameters used for the 1st column (Case s11) are  $r = 1.50$ ,  $s = 0.009$  and for the 2nd column (Case s12)  $r = 1.05$ ,  $s = 0.002$ . Other parameters are  $N_0 = K = 200$ ,  $replicates = 100$

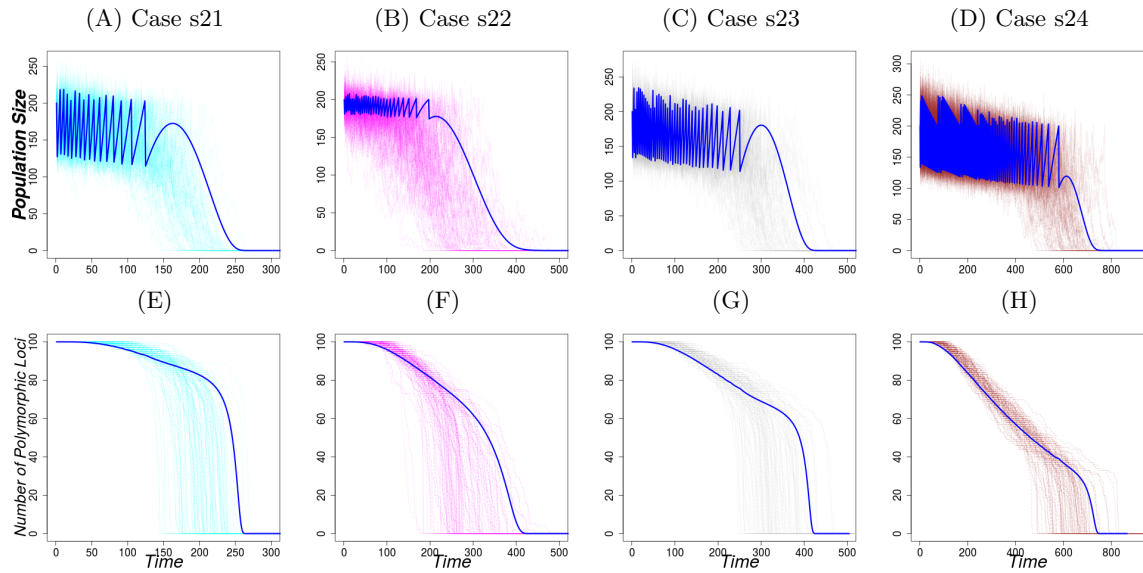

Figure A.3: Variation of the population size and the number of polymorphic loci with time under the geometric growth model with heterozygote advantage for Region II supplementary points. The dark blue lines show the analytic approximation with discretization parameters  $u = 0.1$  and  $\tau = 1$ . The parameters used for 1st column (Case s21)  $r = 1.80, s = 0.009$ , 2nd column (Case s22)  $r = 1.15, s = 0.002$ , 3rd column (Case s23)  $r = 1.8, s = 0.008$  and 4th column (Case s24)  $r = 2.00, s = 0.008$ . Other parameters are  $N_0 = K = 200, replicates = 100$

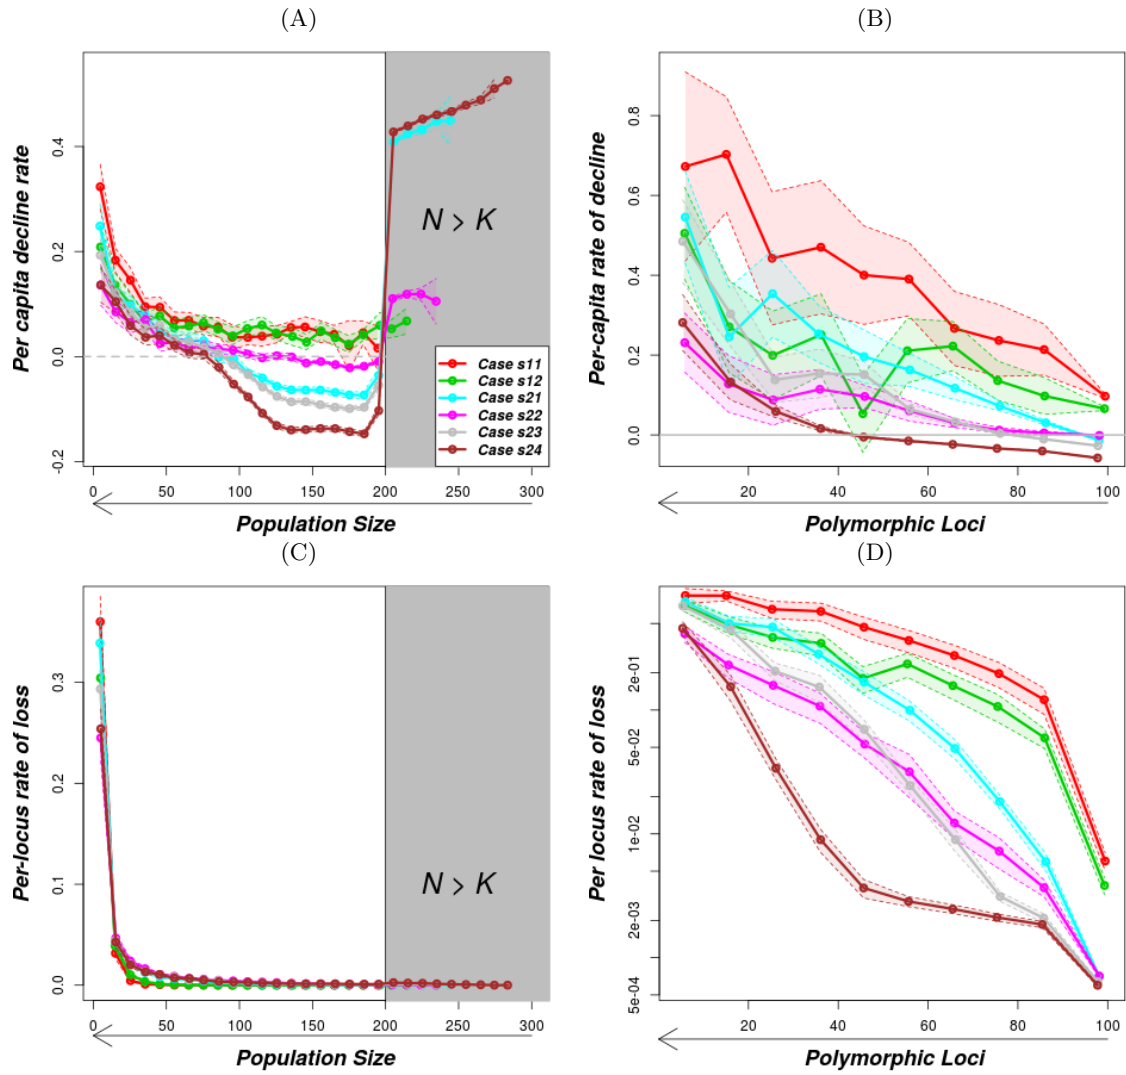

Figure A.4: Variation of the per-capita decline rate and per-locus rate of loss with population size and the number of polymorphic loci under the geometric growth model with heterozygote advantage for Region I and II supplementary points. The parameters used are as on Figures A.2 and A.3 for the respective cases.

609 **A.4.2 Early-warning signals**

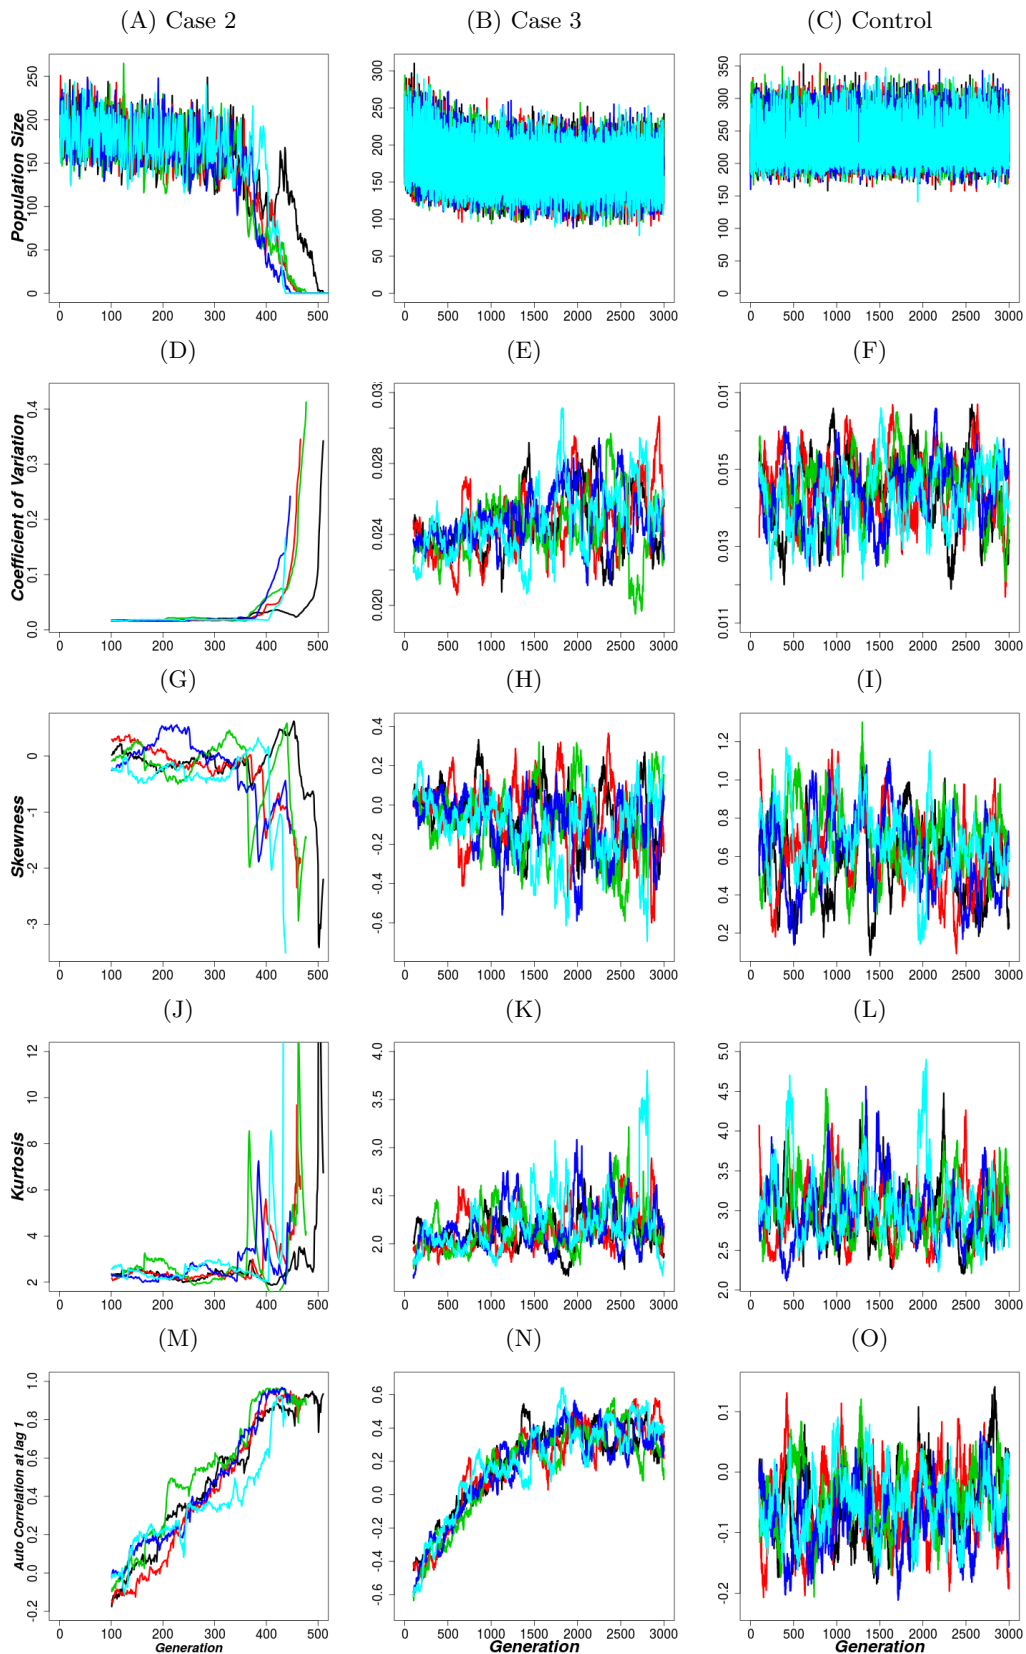

Figure A.5: A random sample of 5 IBM realisations showing population-size trajectories (1st row) and the corresponding trajectories of early-warning signals (2nd - 5th row) under the geometric growth model with heterozygote advantage. The indicators start from the the 100th generation (because the window range is 100 here). The parameters for the cases are the same as those in Figure 3.



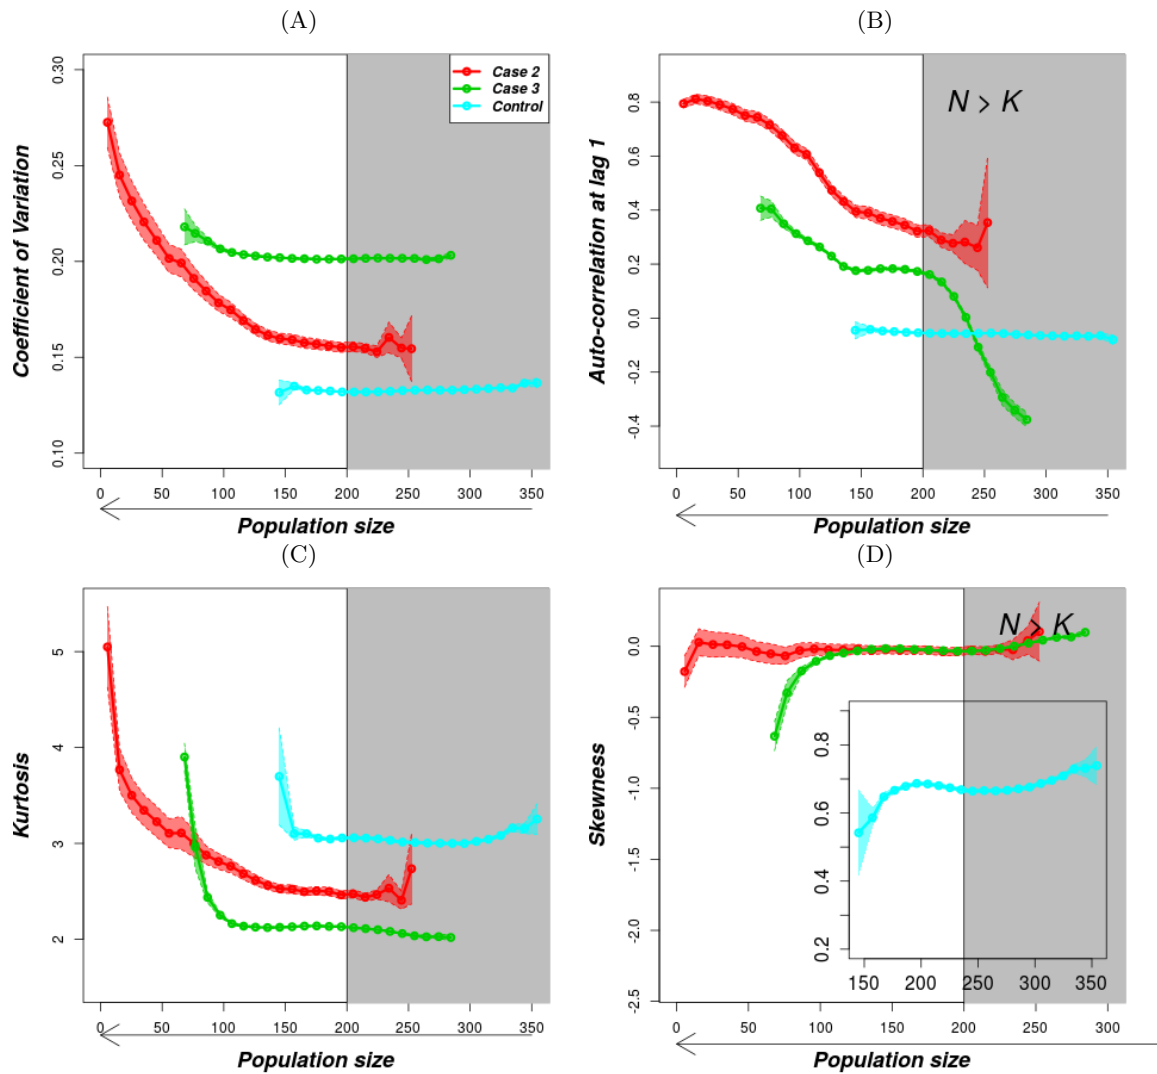

Figure A.6: Variation of early-warning indicators with population size after Gaussian fitting under the geometric population growth model with heterozygote advantage. The solid lines are the mean values of the rates as described in the methods and the shaded regions shows the standard error while the gray-shaded rectangle is a region above carrying capacity. The parameters are as in Figure 3.

## 610 A.5 Supplementary materials for the Ricker model with heterozygote 611 advantage

612 To produce a rapid decline in population size, there is need for a large carrying capacity. The reason is  
613 that the overall population growth rate (product of fitness and fertility) increases exponentially with  
614 decreasing population size. The realized population growth rate is given by  $SOI = W(H)e^{r(1-\frac{N}{K})}$ .  
615 The equilibrium population size is below  $K$  even when we have 100% polymorphic loci because the  
616 mean fitness  $W(H)$  is always below 1.

617 As genetic variation decreases, the population fitness decreases, while as population size decreases,  
618 fertility increases. For a small carrying capacity, fertility may increase faster than the decrease in  
619 fitness which results into  $SOI > 1$ . No rapid population decline to extinction may be observed in this  
620 case. Nevertheless, both small and large carrying capacity populations still exhibit similar trends  
621 in the per-capita and per-locus rates as population size decreases (see Figures A.9 and A.10). This  
622 implies that some small populations may face an extinction vortex unnoticed if the main focus is on  
623 how rapid the population size declines.

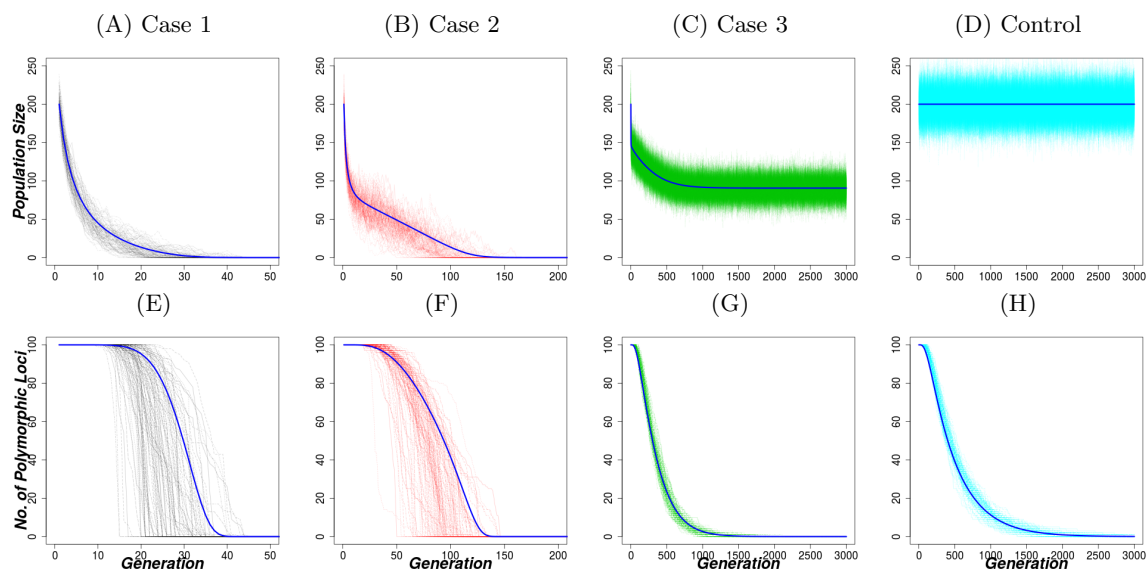

Figure A.7: Dynamics of population size and genetic variation under the Ricker population growth model with heterozygote advantage. Each column represents one case indicated in Figure 2A. 1st column (Case 1):  $r = \ln(1.2)$ , 2nd column (Case 2):  $r = \ln(1.5)$  and 3rd column (Case 3):  $r = \ln(2.5)$ . Other parameters are  $s = 0.005$ ,  $N_0 = K = 200$ ,  $replicates = 100$ . The 4th column represents the control case with the same parameters as in the 2nd column but  $s = 0.00$ . The blue line is the corresponding analytic approximation with discretization parameters  $u = 0.1$  and  $\tau = 1$ .

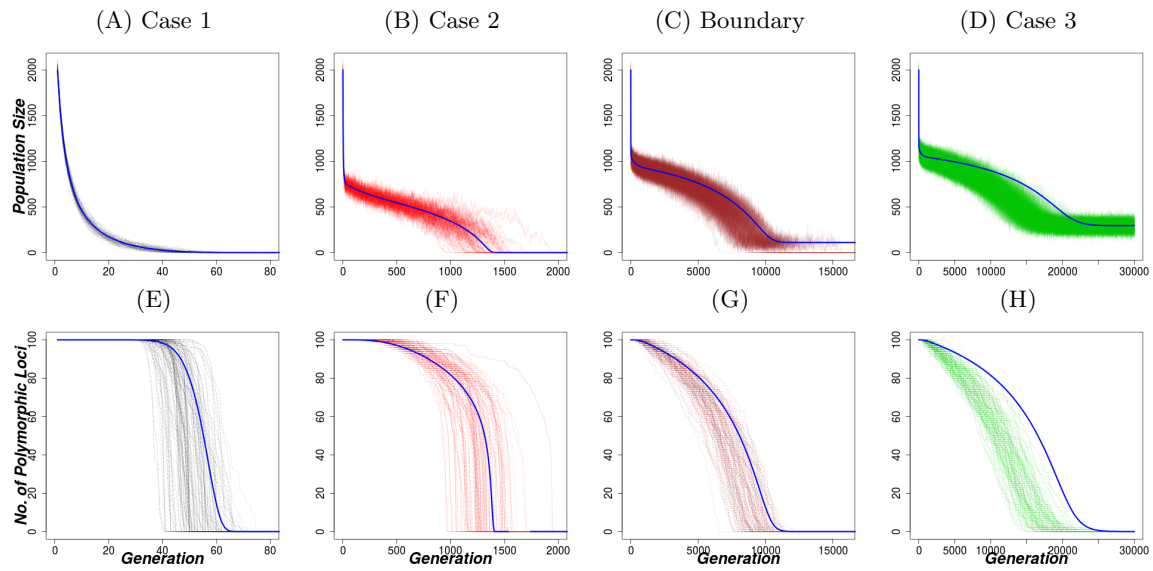

Figure A.8: Dynamics of population size and genetic variation under the Ricker population growth model with heterozygote advantage and an increased carrying capacity. Each column represents one case indicated in Figure 2A. 1st column (Case 1):  $r = \ln(1.2)$ , 2nd column (Case 2):  $r = \ln(1.5)$  and 3rd column (Case 3):  $r = \ln(1.8)$ . Other parameters are  $s = 0.005$ ,  $N_0 = K = 2000$ ,  $replicates = 100$ . The 4th column represents the boundary case with the same parameters as for the other cases but  $r = \ln(1.7)$ . The blue line is the corresponding analytic approximation with discretization parameters  $u = 0.1$  and  $\tau = 1$ .

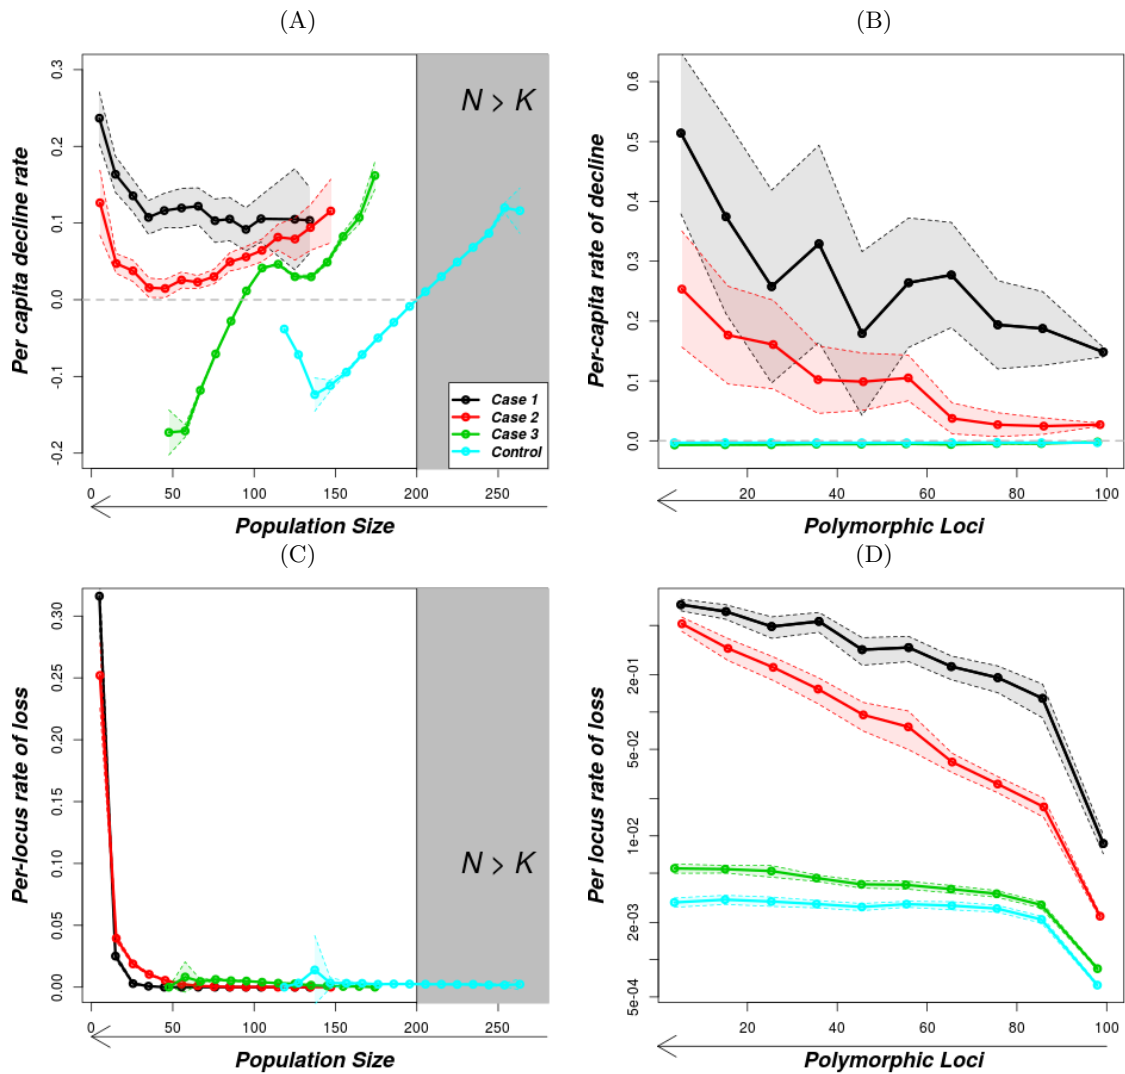

Figure A.9: Per-capita rates of population decline and per-locus rates of loss of polymorphic loci under the Ricker population growth model with heterozygote advantage. The solid lines are the mean values of the rates as described in the methods and the shaded regions shows the standard error. The parameters for the 4 cases are as in Figure A.7. In Figure (d), the y-axis is on a logarithmic scale.

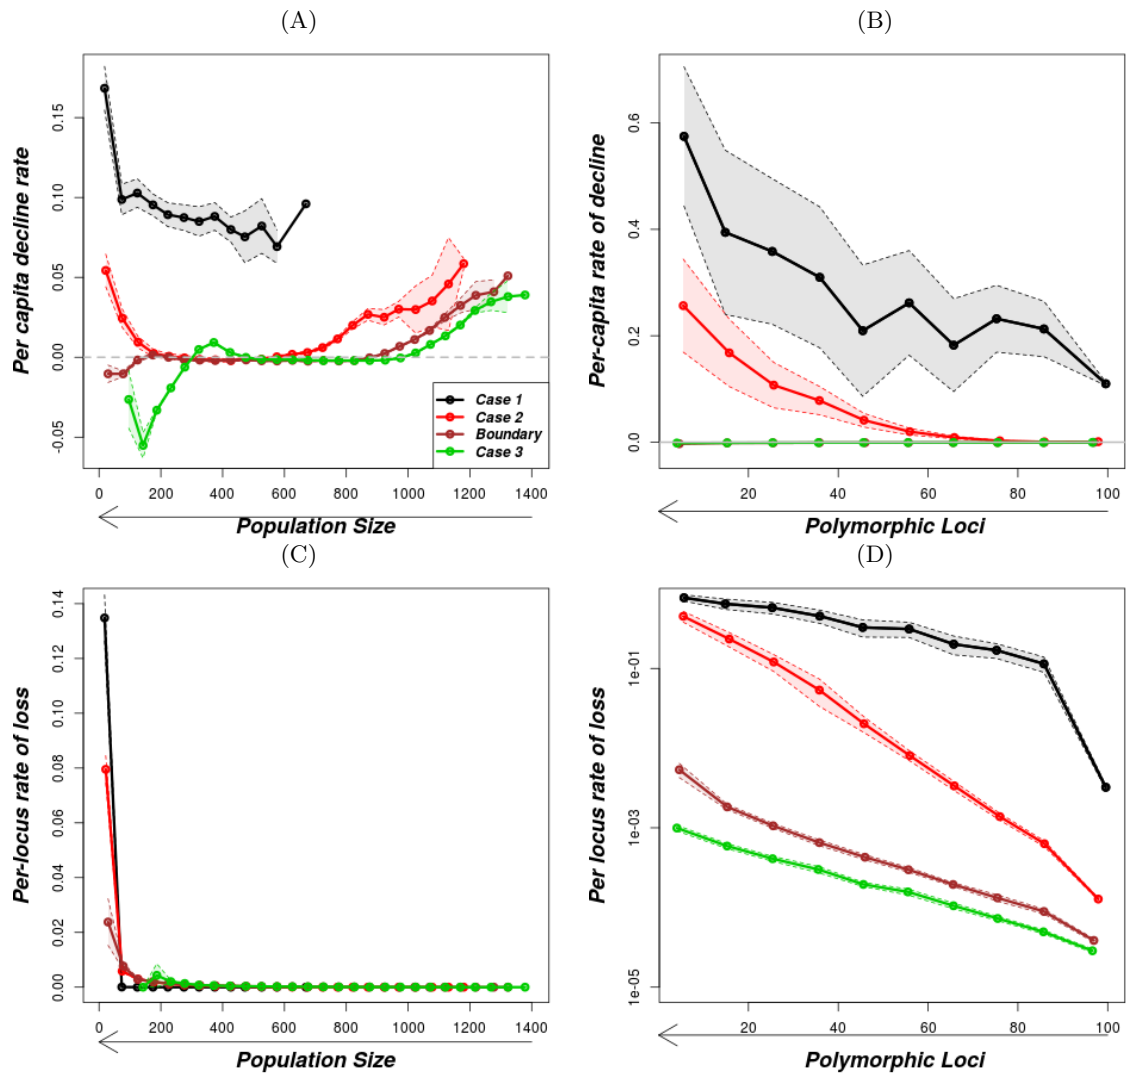

Figure A.10: Per-capita rates of population decline and per-locus rates of loss of polymorphic loci under the Ricker population growth model with heterozygote advantage. The solid lines are the mean values of the rates as described in the methods and the shaded regions shows the standard error. The parameters for the 4 cases are as in Figure A.8. In (d), the y-axis is on a logarithmic scale.

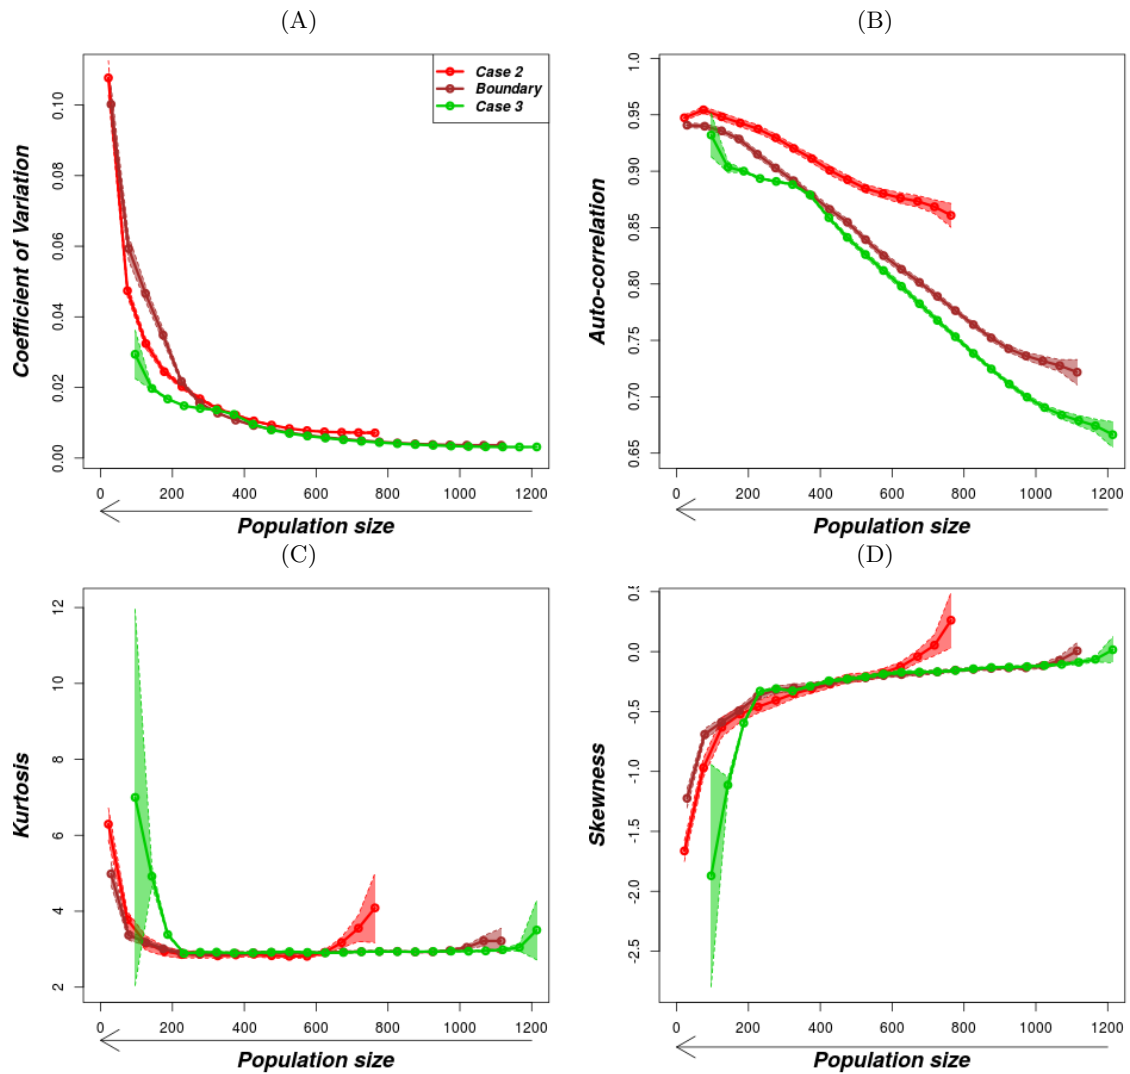

Figure A.11: Variation of early-warning indicators with population size under the Ricker population growth model with heterozygote advantage. The solid lines are the mean values of the rates as described in the methods and the shaded regions shows the standard error while the gray-shaded rectangle is a region above carrying capacity. The parameters are as in Figure A.8.

624 **A.6 Supplementary figures on the geometric growth model with fluctu-**  
 625 **ating selection and dominance reversal**

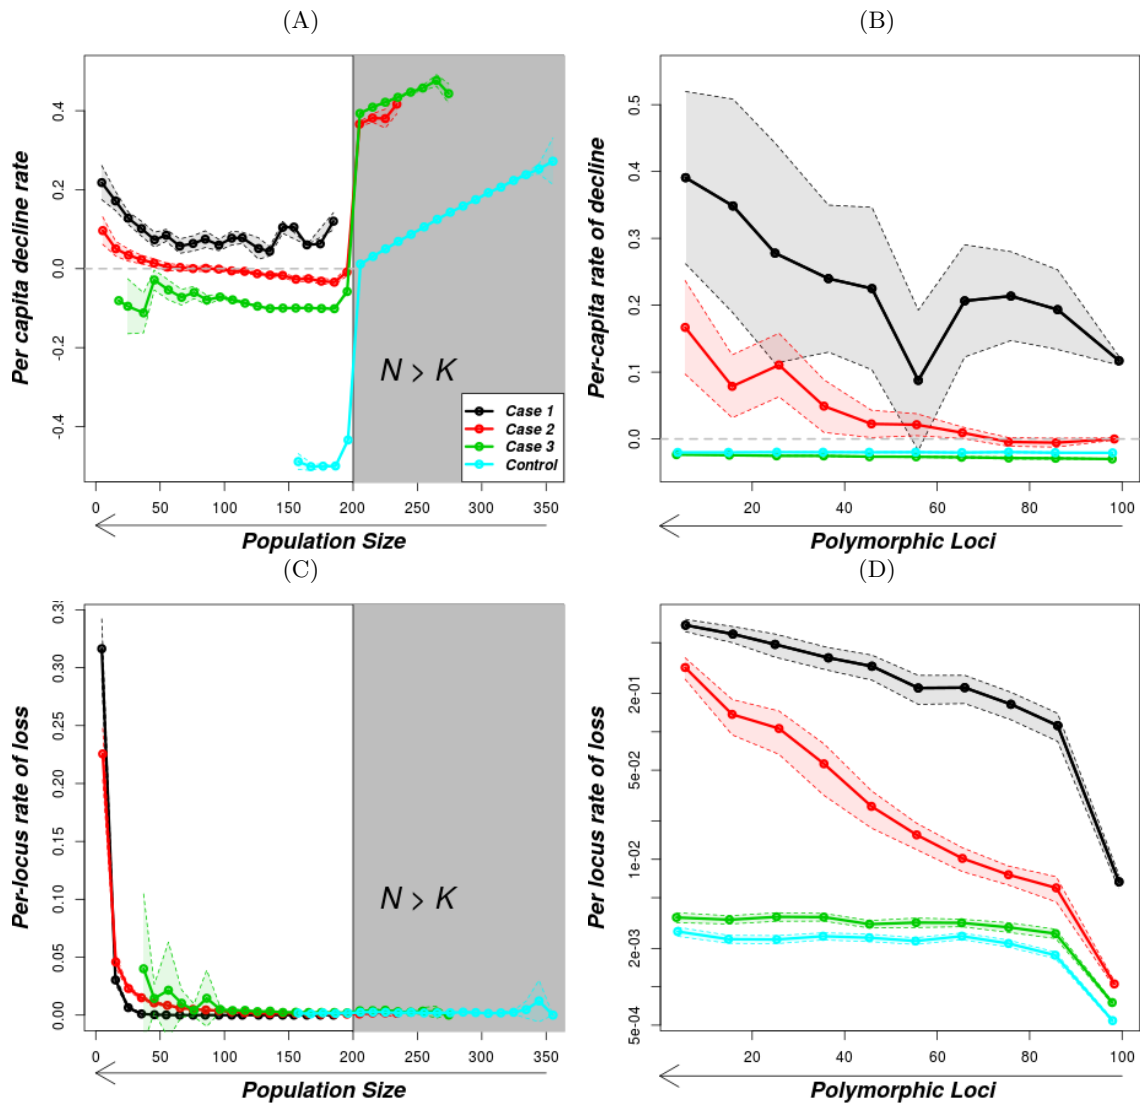

Figure A.12: Variation of per-capita decline rate and per-locus rate of loss as population size and number of polymorphic loci decreases under the geometric population growth model and fluctuating selection with reversal of dominance. The gray-shaded part in (a) is the region above carrying capacity. The solid lines are the mean values of the rates as described in the methods and the shaded regions shows the standard error. The horizontal gray line in (a) and (c) is for rate 0. The parameters for the 4 cases are as in Figure 6 and for the control case, the parameters are the same as those in Figure 3 column 4.

626 A.6.1 Other randomly chosen points in Regions I and II

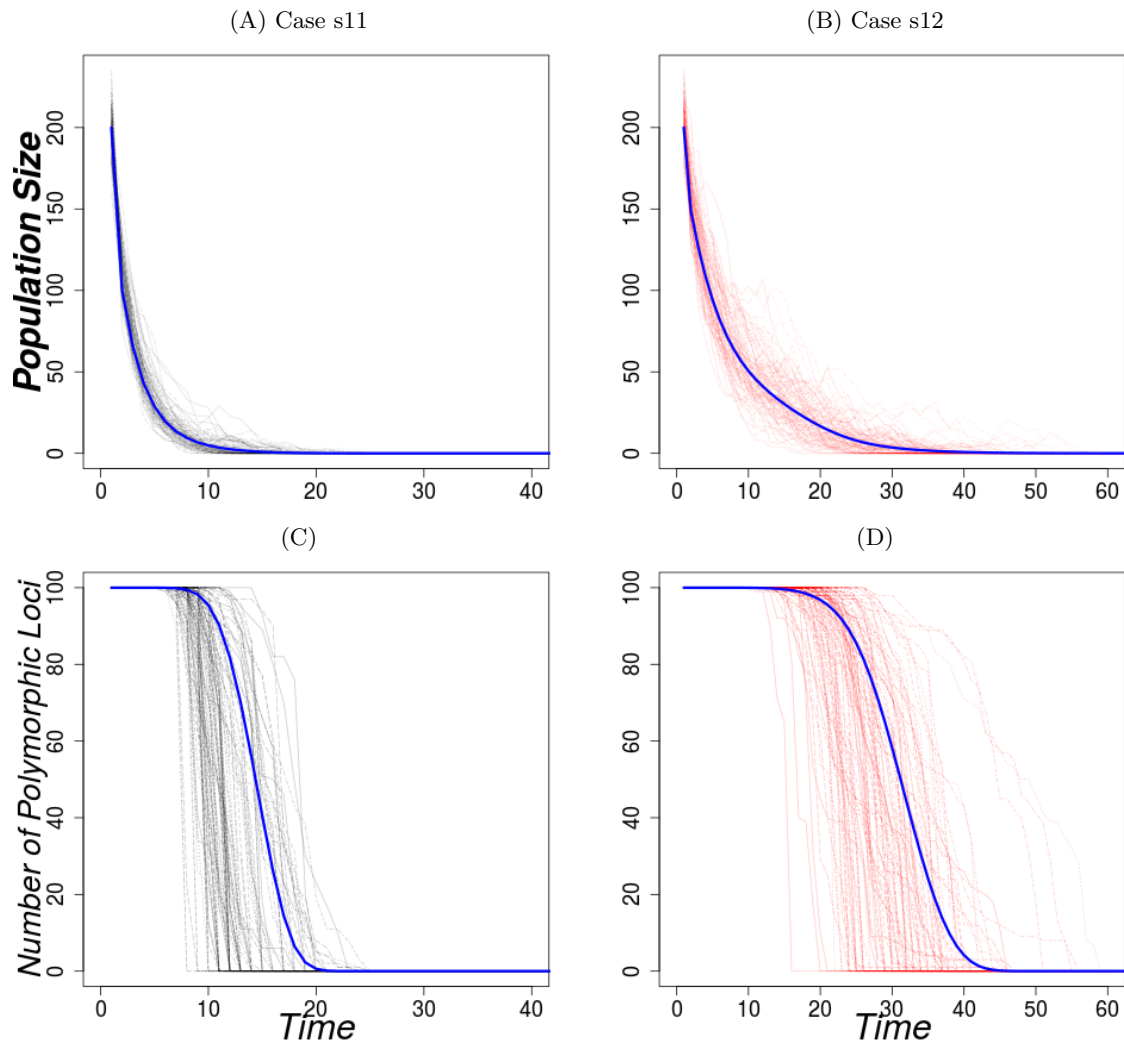

Figure A.13: Variation of the population size and the number of polymorphic loci with time under the geometric growth model with fluctuating selection for Region I supplementary points. The dark blue lines show the analytic approximation with discretization parameters  $u = 0.1$  and  $\tau = 1$ . The parameters used for the 1st column (Case s11) are  $r = 1.30$ ,  $s = 0.007$  and for the 2nd column (Case s12)  $r = 1.15$ ,  $s = 0.003$ . Other parameters are  $N_0 = K = 200$ ,  $replicates = 100$ .



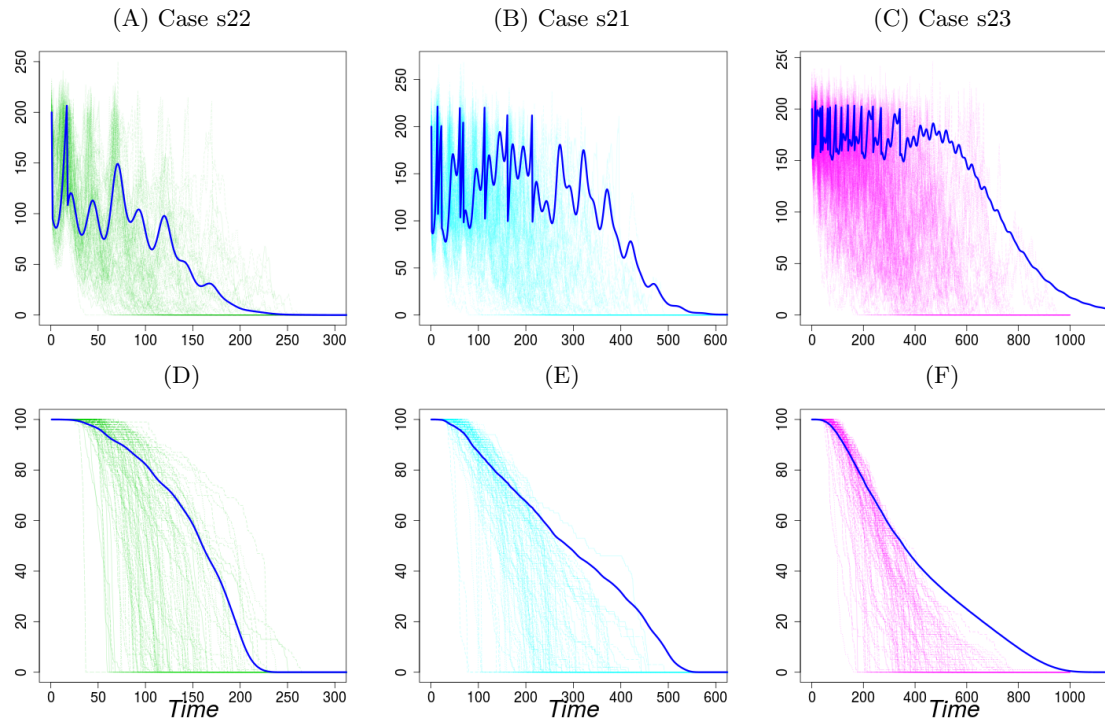

Figure A.14: Variation of the population size and the number of polymorphic loci with time under the geometric growth model with fluctuating selection for Region II supplementary points. The dark blue lines show the analytic approximation with discretization parameters  $u = 0.1$  and  $\tau = 1$ . The parameters used for the 1st column (Case s11)  $r = 2.00, s = 0.0075$  and for the 2nd column (Case s12)  $r = 2.20, s = 0.0082$  and 3rd column (Case s13)  $r = 1.3, s = 0.0027$ . Other parameters are  $N_0 = K = 200, replicates = 100$ .

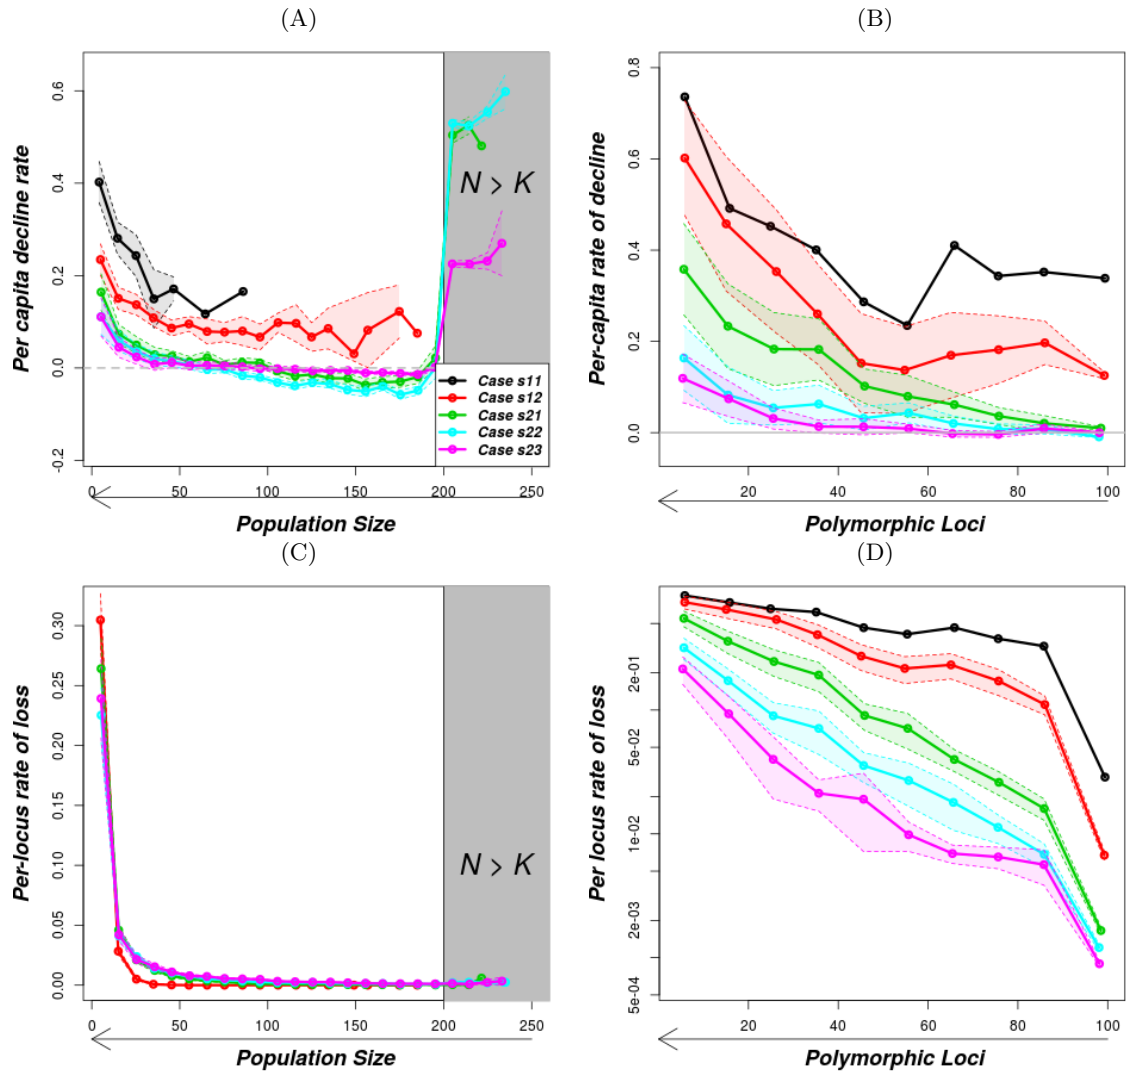

Figure A.15: Per-capita decline rate and per-locus rate of loss as population size and the number of polymorphic loci varies under geometric growth model with fluctuating selection for Region I and II supplementary points. The parameters used are as on Figures A.13 and A.14 for the respective cases.

627 A.6.2 Early-warning signals

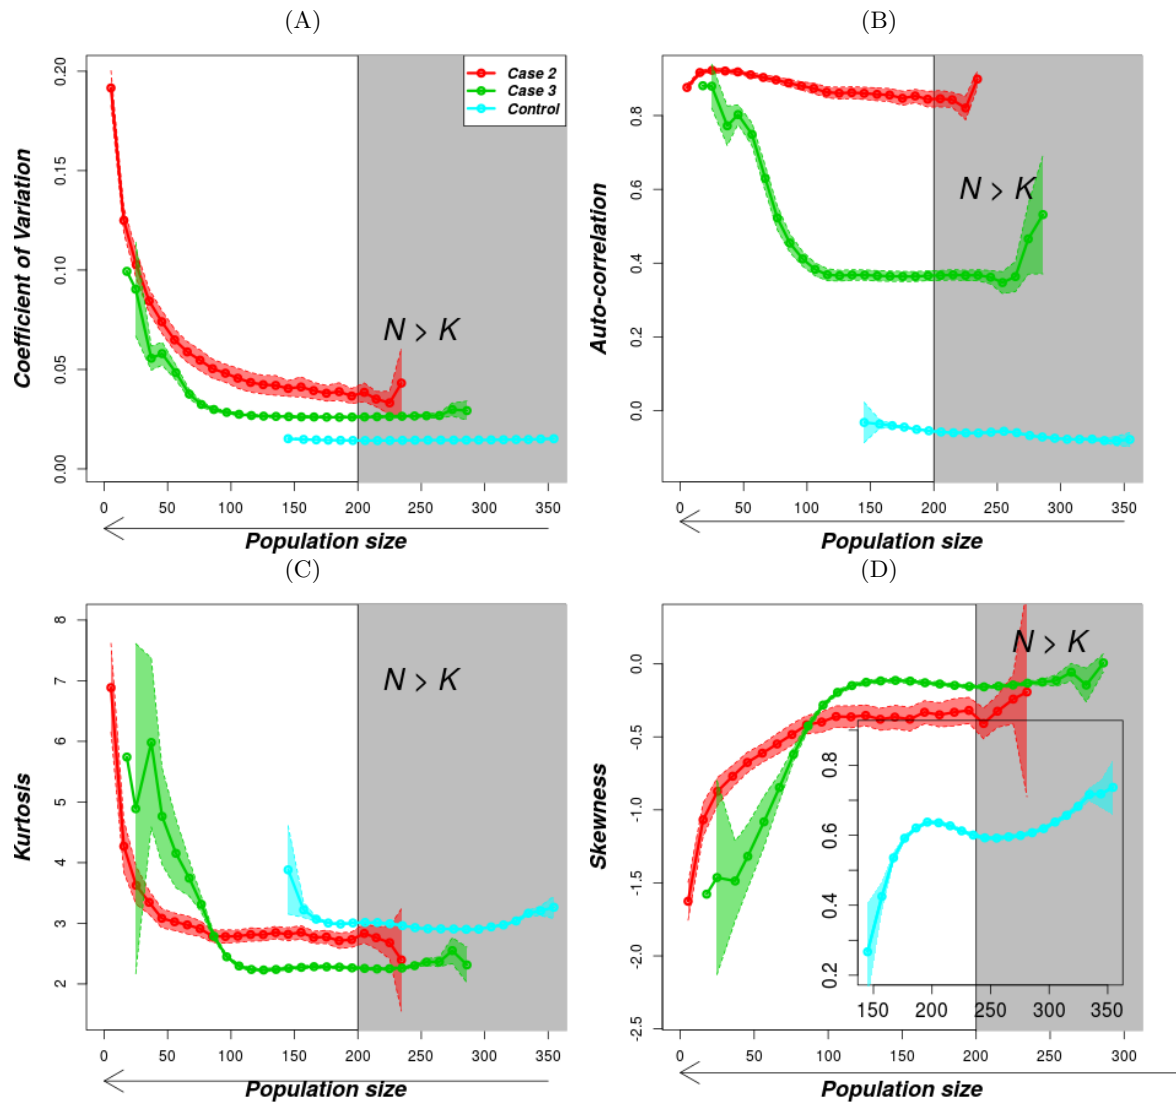

Figure A.16: Variation of early-warning indicators with population size under the geometric population growth model and fluctuating selection with reversal of dominance. The solid lines are the mean values of the rates as described in the methods and the shaded regions show the standard error while the gray-shaded rectangle is the region above carrying capacity. The parameters for the 3 cases are as in Figure 6.
